# Supplementary material
Source: PubMed Central journal article supplement (PMC8592538)

# 1 Supplementary Figure 1

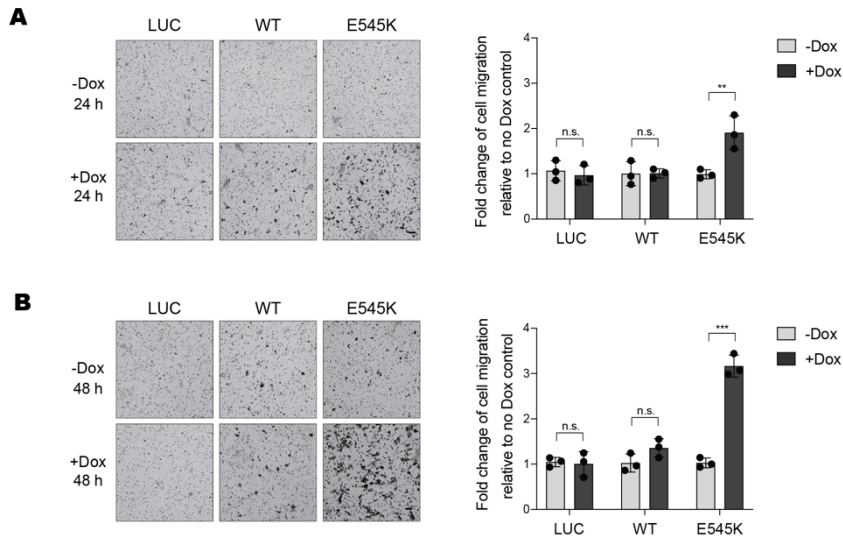

2

## 3 The Q75E *PIK3CA* mutation exhibits an activating phenotype in a HNSCC platform

4 Cell migration assays. PCI-52-SD1 cells were applied to Boyden chambers and incubated for 24h

5 (A) or 48 h (B) in the absence or presence of doxycycline (Dox, 1  $\mu$ g/mL), followed by crystal

6 violet staining. Images were taken from the bottom side of transmembrane chambers. Scale bar,

7 100  $\mu$ m. The migrated cells were quantified using ImageJ and the relative cell migration level was

8 normalized to no Dox treatment (n=3). Columns represent the mean  $\pm$  sd. \*\*\*p < 0.001, \*\*p < 0.01,

9 n.s.  $\geq$  0.05 for Student's pairwise t-test. The experiments were repeated twice with similar results.

10 **Supplementary Figure 2**

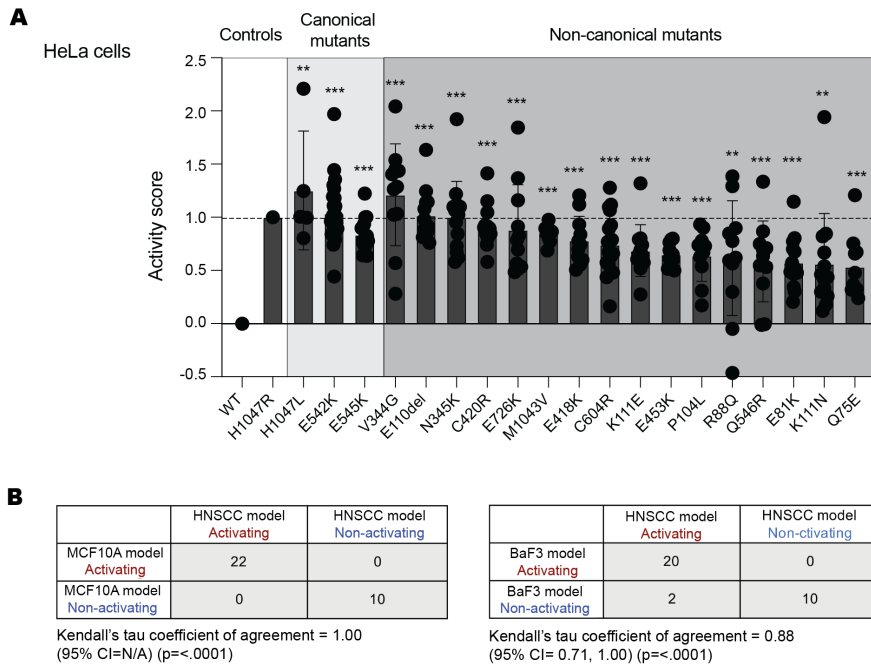

11

12 **Functional characterization of all 32 non-canonical *PIK3CA* mutations in HNSCC serum-**  
 13 **dependent model**

14 (A) Functional assessment of 16 non-canonical *PIK3CA* mutations in HeLa cells using an *in vitro*  
 15 cell-based assay. HeLa cells were engineered to express a fluorescently tagged FOXO1  
 16 transcriptional factor. Cells were then transfected to overexpress WT and mutant *PIK3CA*, followed  
 17 by fixation and scanning using a fluorescent microscope to detect reporter localization that  
 18 generated nuclear-to-cytoplasmic ratios (NCR) to provide comparisons between signaling activity  
 19 for each mutant (n>5). The y-axis of activity score represents NCR values, which were normalized  
 20 and scored according to the activation levels of *PIK3CA* WT and the canonical *PIK3CA* mutation  
 21 H1047R (0 represents WT activity and 1 is the activity of the *PIK3CA* H1047R). The dashed line  
 22 was set as the value equal to the activity of the *PIK3CA* H1047R mutant (1). A mutation was  
 23 defined as “activating” if the mutation exhibited an activity significantly higher than WT. All  
 24 mutants were assessed with more than 10 replicates, except for H1047R (n=5). Columns represent

25 the mean  $\pm$  sd. \*\*\* $p < 0.001$ , \*\* $p < 0.01$  for Student's pairwise t-test. **(B)** Correlation analysis  
26 between the functional data from the HNSCC model and data from the Ba/F3 and MCF10A models,  
27 respectively. The agreement between the two datasets was assessed by Kendall's tau correlation  
28 coefficient as indicated in the table.

29 **Supplementary Figure 3**

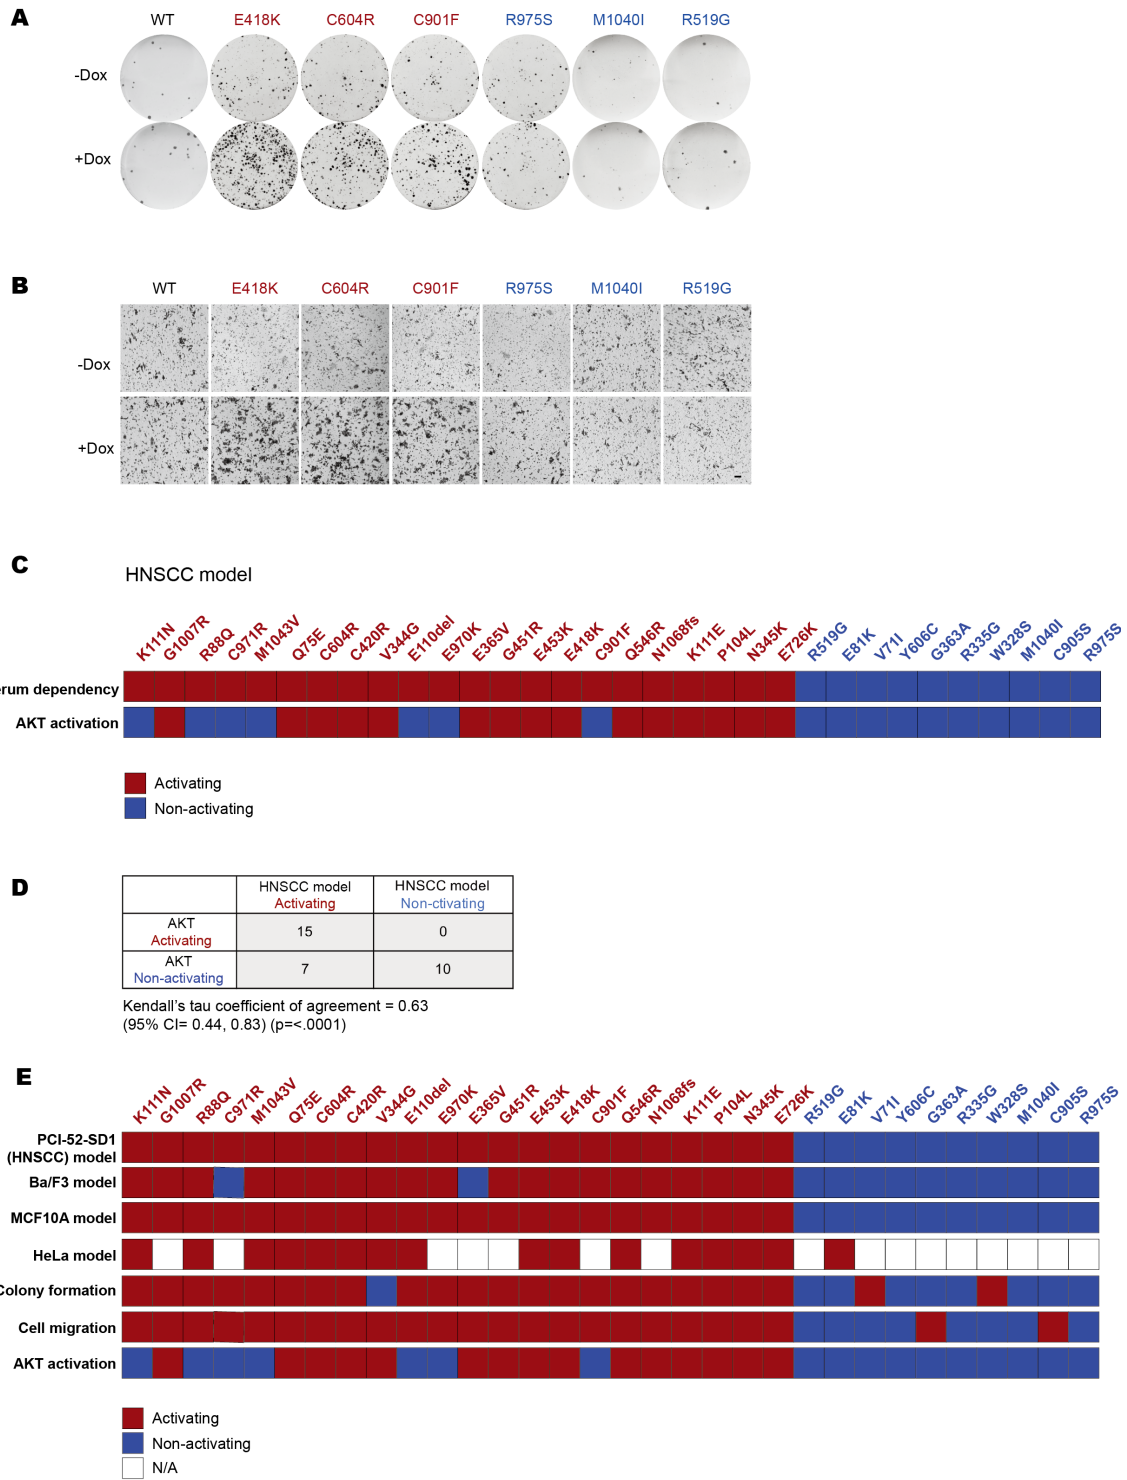

31 **Colony formation and migratory phenotypes of activating and non-activating non-canonical**  
32 ***PIK3CA* mutations**

33 (A) Colony formation images of isogenic PCI-52-SD1 HNSCC cells expressing WT *PIK3CA* or  
34 the indicated representative activating and non-activating, non-canonical mutants. Cells were  
35 cultured in the absence or presence of Dox (1  $\mu\text{g}/\text{mL}$ ) and incubated for 3 weeks, followed by  
36 crystal violet staining. The experiment was repeated twice with similar results. (B) Representative  
37 cell migration images of cells expressing activating and non-activating *PIK3CA* mutations. Cells  
38 were applied to Boyden chambers and incubated for 48 h in the absence or presence of Dox,  
39 followed by crystal violet staining. Images were taken from bottom side of the transmembrane  
40 chambers. Scale bar, 250  $\mu\text{m}$ . The experiment was repeated twice with similar results. (C)  
41 Alignment between data from serum-dependence assays and assessments of AKT activation in the  
42 isogenic HNSCC cells. The AKT activation was evaluated by immunoblotting to assess the ratio  
43 of pAKT (S473)/(total AKT). Mutations were assigned as “activating” if the mutations exhibited  
44 an activity higher than WT *PIK3CA*, otherwise the mutations were annotated as “non-activating”.

45 (D) Correlation analysis between findings from serum-dependence assays and AKT activation  
46 assessments in HNSCC models. The agreement between the two datasets was assessed by  
47 Kendall’s tau correlation coefficient as indicated in the table. (E) Heatmap summarizing activation  
48 status and oncogenic phenotype of each HNSCC-associated non-canonical *PIK3CA* mutation  
49 across 4 distinct cellular platforms and 2 phenotypic assays and biochemical evaluation of AKT  
50 phosphorylation.

51 **Supplementary Figure 4**

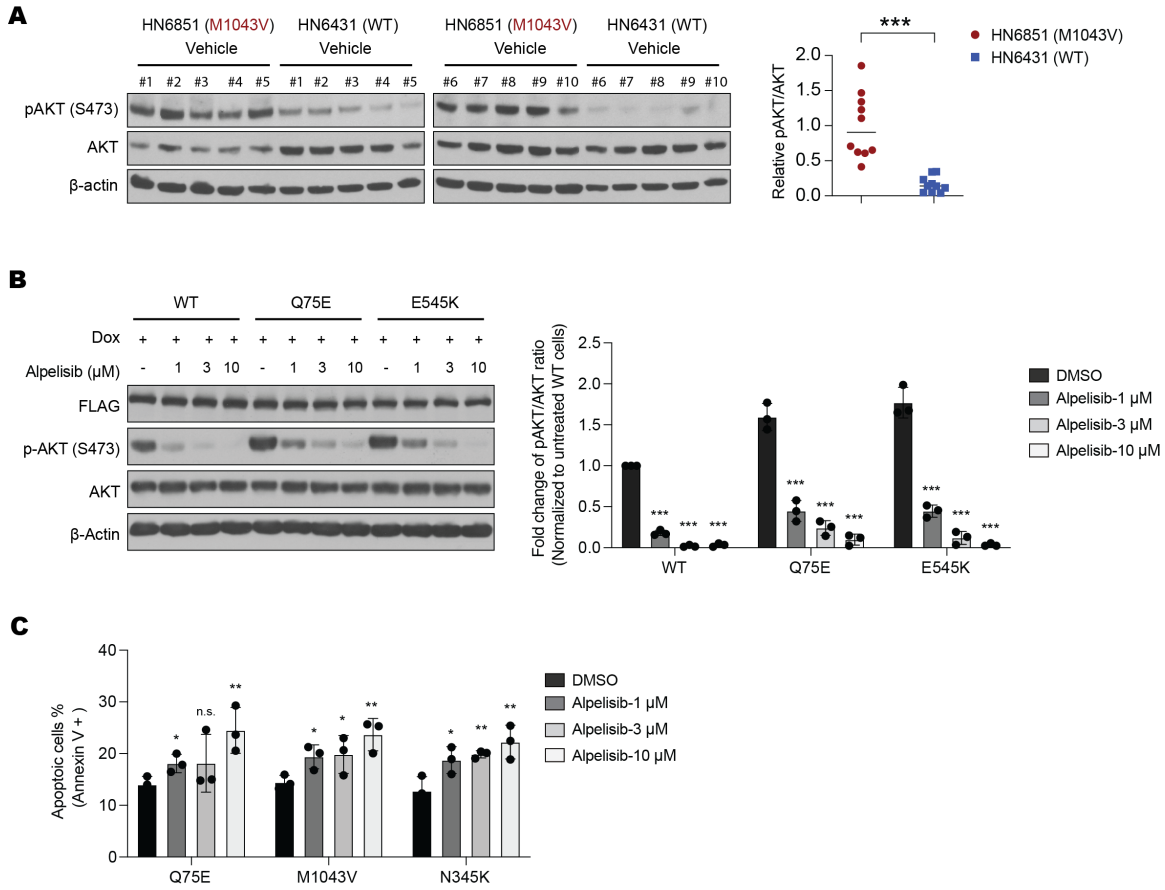

52

53 **Response to alpelisib in HNSCC preclinical models expressing non-canonical *PIK3CA***  
 54 **mutations**

55 (A) Immunoblot analysis of AKT activation in the vehicle treated PDX tumors. Tumor samples  
 56 were collected at 3 h after the last dosing. AKT activation was detected by the phosphorylation of  
 57 AKT S473.  $\beta$ -actin, loading control. The fold change in the ratio pAKT/(total AKT) in the HN6851  
 58 PDX tumors was quantified by densitometry and normalized to the mean value in the HN6431  
 59 PDX tumors. \*\*\* $p < 0.001$  for Student's pairwise t-test. (B) Immunoblot analysis of AKT  
 60 activation in the isogenic PCI-52-SD1 cells expressing WT or mutant *PIK3CA*. Cells in the  
 61 presence of Dox (1  $\mu$ g/mL) were treated alpelisib at 1  $\mu$ M, 3  $\mu$ M and 10  $\mu$ M for 3 h before harvesting.  
 62 AKT activation was detected by phosphorylation of S473.  $\beta$ -actin, loading control. The experiment  
 63 was repeated three times with similar results. The fold change of the ratio of pAKT/(total AKT)

64 was quantified by densitometry and normalized to the untreated WT cells. (C) Cell apoptosis assays.  
65 PCI-52-SD1 cells in the presence of Dox (1 ug/mL) were treated with alpelisib at 1  $\mu$ M, 3  $\mu$ M and  
66 10  $\mu$ M for 72 h. The percentage of apoptosis was determined by flow cytometry using Annexin V  
67 staining. The experiment was repeated three times with similar results. Columns represent the mean  
68  $\pm$  sd. \*\*p < 0.01, \*p < 0.1, n.s.  $\geq$  0.05 for Student's pairwise t-test.

69 **Supplementary Table 1. Next generation sequencing results of the index patient's tumor**

70 Next generation sequencing of the index patient's recurrent tumor for 244 genes known to be

71 somatically altered in HNSCC revealed a non-canonical *PIK3CA* mutation.

| SNV & indel |           |           |        |                              |                      |        |      |
|-------------|-----------|-----------|--------|------------------------------|----------------------|--------|------|
| Chromosome  | Start     | End       | Symbol | Amino_acid                   | Exonic_function      | Cosmic | ICGC |
| 4           | 153247366 | 153247366 | FBXW7  | p.R361Q, p.R399Q,<br>p.R479Q | nonsynonymous<br>SNV | 41     | 12   |
| 3           | 30732970  | 30732970  | TGFBR2 | p.R553H, p.R528H             | nonsynonymous<br>SNV | 4      | 3    |
| 3           | 142168444 | 142168444 | ATR    | p.A2588S                     | nonsynonymous<br>SNV | 0      | 0    |
| 3           | 178916836 | 178916836 | PIK3CA | p.Q75E                       | nonsynonymous<br>SNV | 1      | 1    |

| CNV    |           |            |           |           |             |    |
|--------|-----------|------------|-----------|-----------|-------------|----|
| Tool   | Sample ID | Chromosome | Start     | End       | Gene symbol | CN |
| CNVkit | 27-S031   | chr3       | 181430138 | 181579744 | SOX2        | 14 |

| mRNA expression |             |           |               |
|-----------------|-------------|-----------|---------------|
| Gene Name       | UP<br>TOP 5 | Gene Name | DOWN<br>TOP 5 |
| CXCL9           | 7.21        | JCHAIN    | -607.27       |
| CXCL10          | 3.95        | CXCR5     | -49.64        |
| BST2            | 3.47        | CD27      | -33.42        |
| CXCL13          | 2.54        | BTN1A1    | -21.48        |
| HPRT1           | 2.14        | LY9       | -14.7         |

72 NGS panel (244 genes known to be somatically altered in HNSCC)

|         |        |        |        |        |        |            |
|---------|--------|--------|--------|--------|--------|------------|
| ABL1    | ABL2   | AKT1   | AKT2   | AKT3   | APC    | AR         |
| ATM     | ATR    | ATRX   | AURKA  | AURKB  | AXL    | BAP1       |
| BRCA2   | BRD3   | BRD4   | BRD7   | BUB1   | CASP8  | CBL        |
| CDH9    | CDK12  | CDK4   | CDK6   | CDK8   | CDKN1B | CDKN2A     |
| CHD4    | CHD5   | CHD7   | CHEK1  | CHEK2  | CREBBP | CRKL       |
| CUL3    | DACH1  | DAXX   | DDR2   | DNMT1  | DNMT3A | DNMT3B     |
| EPHA2   | EPHA3  | EPHA4  | EPHA5  | EPHA7  | EPHB1  | EPHB4      |
| FAM123B | FAT1   | FAT2   | FAT3   | FAT4   | FBN2   | FBXW7      |
| GATA1   | GATA2  | GATA3  | GNA11  | GNA13  | GNAQ   | GNAS       |
| HDAC7A  | HDAC9  | HRAS   | IDH1   | IDH2   | IGF1R  | IKBKE      |
| KDM5A   | KDM5C  | KDM6A  | KDR    | KEAP1  | KIT    | KLHL1      |
| LAMC2   | MAP2K1 | MAP2K2 | MAP2K4 | MAP3K1 | MAP3K8 | MAP3K9     |
| MLH1    | MLL1   | MLL2   | MLL3   | MTOR   | MYC    | MYCL1      |
| NOTCH1  | NOTCH2 | NPM1   | NRAS   | NSD1   | PAK3   | PAK5(PAK7) |
| PIK3C2G | PIK3C3 | PIK3CA | PIK3CB | PIK3CD | PIK3CG | PIK3R1     |
| PRB2    | PRKCI  | PTCH1  | PTEN   | PTK2B  | PTPN11 | PTPRD      |



|         |         |         |        |         |         |         |
|---------|---------|---------|--------|---------|---------|---------|
| RELN    | RHOA    | RICTOR  | RIT1   | RPS6KA1 | RPTOR   | SETD2   |
| SMARCA4 | SMARCA4 | SMARCB1 | SMO    | SOCS1   | SOX10   | SOX2    |
| TET2    | TGFBR2  | TOP1    | TP53   | TP63    | TRIO    | TSC1    |
| ARAF    | ARID1A  | ARID2   | ASH1L  | ASXL1   | ASXL3   | TSC2    |
| BARD1   | BIRC3   | BIRC6   | BLM    | BRAF    | BRCA1   | VHL     |
| CCND1   | CCND2   | CCND3   | CCNE1  | CDH1    | CDH10   | WHSC1L1 |
| CDKN2B  | CDKN2C  | CEBPA   | CEP350 | CFTR    | CHD2    |         |
| CTNNA1  | CTNNA2  | CTNNB1  | CTNND2 | CTSK    | CTTN    |         |
| DOT1L   | DUSP27  | EGFR    | EP300  | EPCAM   | EPHA1   |         |
| ERBB    | ERBB2   | ERBB3   | ERBB4  | ERG     | EZH2    |         |
| FES     | FGFR1   | FGFR2   | FGFR3  | FGFR4   | FOXP1   |         |
| GPR98   | HDAC1   | HDAC2   | HDAC3  | HDAC5   | HDAC6   |         |
| IL7R    | ITGB1   | ITGB3   | JAK1   | JAK2    | JAK3    |         |
| KLHL6   | KMT2D   | KRAS    | LAMA2  | LAMA3   | LAMB3   |         |
| MAPK1   | MAPK9   | MBD1    | MBD2   | MDM4    | MET     |         |
| MYCN    | NF1     | NF2     | NFE2L2 | NFKBIA  | NKX2-1  |         |
| PBRM1   | PDGFRA  | PDGFRB  | PDK1   | PIK3C2A | PIK3C2B |         |
| PIK3R2  | PIK3R3  | PIK3R6  | PPFIA2 | PPP2R1A | PRB1    |         |
| RAC1    | RAD50   | RAD51   | RAF1   | RASSF1A | RB1     |         |
| SIRT1   | SIRT2   | SMAD2   | SMAD3  | SMAD4   | SMARCA2 |         |
| SRC     | STAT3   | STAT4   | STK11  | STYK1   | TERT    |         |

73

74 **Supplementary Table 2. Targeted sequencing results of PCI-52 cells**

| Gene_Name | Chromosome | snpEff.EFF                       | Effect_Impact | Functional_Class | Codon_Change  | Amino_Acid_change |
|-----------|------------|----------------------------------|---------------|------------------|---------------|-------------------|
| PDGFRB    | 5          | NON_SYNONYMOUS_CODING            | MODERATE      | MISSENSE         | aCg/aTg       | T464M             |
| MSH6      | 2          | NON_SYNONYMOUS_CODING            | MODERATE      | MISSENSE         | aTa/aCa       | I967T             |
| RB1       | 13         | NON_SYNONYMOUS_CODING            | MODERATE      | MISSENSE         | Gcg/Tcg       | A18S              |
| PRKCG     | 19         | NON_SYNONYMOUS_CODING            | MODERATE      | MISSENSE         | cGc/cAc       | R252H             |
| PDGFRA    | 4          | NON_SYNONYMOUS_CODING            | MODERATE      | MISSENSE         | Atc/Gtc       | I539V             |
| PTCH1     | 9          | INTRON_MODIFIER                  | LOW           | -                | -             | -                 |
| ATM       | 11         | NON_SYNONYMOUS_CODING            | MODERATE      | MISSENSE         | Atg/Gtg       | M963V             |
| APC       | 5          | NON_SYNONYMOUS_CODING            | MODERATE      | MISSENSE         | Aat/Cat       | N2726H            |
| CSMD3     | 8          | NON_SYNONYMOUS_CODING            | MODERATE      | MISSENSE         | Agt/Cgt       | S2282R            |
| TP53      | 17         | CODON_CHANGE_PLUS_CODON_DELETION | MODERATE      | -                | aactacatg/atg | NYM103M           |
| BIRC2     | 11         | FRAME_SHIFT                      | HIGH          | -                | -             | -                 |

75

76 **Supplementary Table 3. Functional characterization of all 32 non-canonical *PIK3CA***  
77 **mutations in cytokine/growth factor-dependent Ba/F3 and MCF10A cell line models**

78 Cells were transfected with WT *PIK3CA* or indicated *PIK3CA* mutants, and then cultured for 4  
79 weeks and harvested for CellTiter-Glo viability assays. The relative cell viability for each mutant  
80 is calculated by the normalization to a range of 1 to 100, when WT *PIK3CA* is 1 and the positive  
81 control (a canonical mutant *PIK3CA* H1047R) is 100. Mutations were not accessed in the same one  
82 experiment and the statistical comparison between WT and mutant (t-test) was done within the  
83 same experiment.

84 **BaF3 cell model**

| Experiment Number | AA_Change | The relative cell viability Average | SD    | p-value | Annotation     |
|-------------------|-----------|-------------------------------------|-------|---------|----------------|
| B01               | V71I      | 0.55                                | 0.05  | 0.528   | Non-activating |
| B02               | W328S     | 1.35                                | 0.22  | 0.415   | Non-activating |
| B03               | C905S     | 2.35                                | 1.44  | 0.383   | Non-activating |
| B03               | R519G     | 2.03                                | 0.03  | 0.448   | Non-activating |
| B04               | E970K     | 32.12                               | 3.53  | 0.000   | Activating     |
| B04               | M1040I    | -1.53                               | 2.21  | 0.370   | Non-activating |
| B05               | E418K     | 10.64                               | 1.40  | 0.015   | Activating     |
| B05               | Y606C     | -0.43                               | 0.34  | 0.567   | Non-activating |
| B05               | R335G     | 1.58                                | 1.24  | 0.815   | Non-activating |
| B06               | Q75E      | 81.29                               | 9.63  | 0.026   | Activating     |
| B07               | E726K     | 115.68                              | 30.96 | <0.0001 | Activating     |
| B07               | M1043V    | 159.91                              | 1.89  | <0.0001 | Activating     |
| B07               | Q546R     | 163.99                              | 1.05  | <0.0001 | Activating     |
| B08               | C420R     | 94.38                               | 24.07 | 0.002   | Activating     |
| B09               | C604R     | 45.65                               | 17.16 | 0.000   | Activating     |
| B09               | R975S     | 2.75                                | 4.73  | 0.616   | Non-activating |
| B09               | C901F     | 41.99                               | 1.38  | <0.0001 | Activating     |
| B10               | G451R     | 20.50                               | 9.02  | 0.018   | Activating     |
| B10               | E365V     | 1.15                                | 0.61  | 0.978   | Non-activating |
| B11               | N1068fs   | 37.77                               | 1.96  | 0.001   | Activating     |
| B11               | G363A     | 1.96                                | 0.22  | 0.060   | Non-activating |
| B11               | C971R     | 1.38                                | 0.27  | 0.293   | Non-activating |
| B12               | K111N     | 12.11                               | 6.66  | 0.001   | Activating     |
| B12               | R88Q      | 11.89                               | 8.94  | 0.003   | Activating     |
| B12               | N345K     | 59.74                               | 6.55  | <0.0001 | Activating     |
| B12               | E453K     | 43.14                               | 19.67 | <0.0001 | Activating     |
| B12               | P104L     | 13.19                               | 2.80  | <0.0001 | Activating     |
| B12               | E110del   | 49.62                               | 12.54 | <0.0001 | Activating     |
| B13               | V344G     | 44.61                               | 2.86  | 0.002   | Activating     |

|     |        |       |      |       |            |
|-----|--------|-------|------|-------|------------|
| B13 | G1007R | 24.11 | 1.56 | 0.003 | Activating |
| B13 | K111E  | 19.47 | 1.87 | 0.006 | Activating |

85 MCF10A cell model

| Experiment Number | AA_Change | The relative cell viability Average | SD    | p-value | Annotation     |
|-------------------|-----------|-------------------------------------|-------|---------|----------------|
| M01               | V71I      | -8.62                               | 1.68  | 0.1596  | Non-activating |
| M02               | W328S     | 10.60                               | 4.47  | 0.2012  | Non-activating |
| M03               | R519G     | -3.38                               | 7.70  | 0.4436  | Non-activating |
| M03               | C905S     | 3.04                                | 2.66  | 0.6444  | Non-activating |
| M04               | E970K     | 38.47                               | 0.04  | 0.0206  | Activating     |
| M04               | M1040I    | -26.69                              | 4.56  | 0.0622  | Non-activating |
| M05               | E418K     | 93.84                               | 15.84 | 0.0126  | Activating     |
| M05               | Y606C     | -26.38                              | 10.52 | 0.1524  | Non-activating |
| M05               | R335G     | 7.91                                | 34.14 | 0.4624  | Non-activating |
| M06               | Q75E      | 60.38                               | 18.24 | 0.0084  | Activating     |
| M07               | E726K     | 79.20                               | 13.45 | <0.0001 | Activating     |
| M07               | M1043V    | 87.21                               | 22.59 | <0.0001 | Activating     |
| M07               | Q546R     | 115.34                              | 22.98 | <0.0001 | Activating     |
| M08               | C420R     | 73.89                               | 19.78 | 0.0007  | Activating     |
| M09               | C901F     | 105.57                              | 31.29 | 0.0002  | Activating     |
| M09               | C604R     | 94.19                               | 35.85 | 0.0005  | Activating     |
| M09               | R975S     | -6.55                               | 0.02  | 0.3164  | Non-activating |
| M10               | E365V     | 24.57                               | 7.57  | <0.0001 | Activating     |
| M10               | G451R     | 67.80                               | 5.79  | <0.0001 | Activating     |
| M11               | N1068fs   | 21.73                               | 3.23  | 0.0231  | Activating     |
| M11               | C971R     | 18.00                               | 2.29  | 0.0256  | Activating     |
| M11               | G363A     | -1.06                               | 0.27  | 0.4579  | Non-activating |
| M12               | K111N     | 7.60                                | 1.41  | 0.0014  | Activating     |
| M12               | E110del   | 21.69                               | 2.56  | <0.0001 | Activating     |
| M12               | E453K     | 17.77                               | 3.23  | <0.0001 | Activating     |
| M12               | N345K     | 87.62                               | 8.92  | <0.0001 | Activating     |
| M12               | P104L     | 14.81                               | 0.57  | <0.0001 | Activating     |
| M12               | R88Q      | 21.60                               | 3.66  | <0.0001 | Activating     |
| M13               | K111E     | 122.33                              | 11.29 | 0.0047  | Activating     |
| M13               | G1007R    | 81.82                               | 7.79  | 0.0055  | Activating     |
| M13               | V344G     | 70.60                               | 12.08 | 0.0159  | Activating     |

86

87 **Supplementary Table 4. Whole exome sequencing results of HNSCC PDX models**88 **HN6851 (*PIK3CA* M1043V)**

| Hugo_Symbol  | Chromosome | Start_position | End_position | Variant_Classification | cDNA_Change | Protein_Change | i_tumor_f |
|--------------|------------|----------------|--------------|------------------------|-------------|----------------|-----------|
| CATSPER4     | 1          | 26524456       | 26524456     | Missense_Mutation      | c.566G>A    | p.R189H        | 0.125     |
| CCDC24       | 1          | 44457994       | 44457994     | Missense_Mutation      | c.237C>G    | p.D79E         | 0.117021  |
| STXBP3       | 1          | 109319034      | 109319034    | Missense_Mutation      | c.673A>T    | p.S225C        | 0.140351  |
| KIF21B       | 1          | 200974705      | 200974705    | Missense_Mutation      | c.565G>A    | p.V189I        | 0.098485  |
| TMCC2        | 1          | 205211075      | 205211075    | Missense_Mutation      | c.650G>A    | p.R217H        | 0.15625   |
| KLHDC8A      | 1          | 205308535      | 205308535    | Missense_Mutation      | c.544G>A    | p.G182R        | 0.076923  |
| OR2T29       | 1          | 248722108      | 248722108    | Missense_Mutation      | c.667G>A    | p.V223I        | 1         |
| OR51E1       | 11         | 4674565        | 4674565      | Missense_Mutation      | c.809G>A    | p.R270H        | 0.092391  |
| OR56B4       | 11         | 6129261        | 6129261      | Missense_Mutation      | c.253C>T    | p.P85S         | 0.095238  |
| SLC17A6      | 11         | 22363183       | 22363183     | Missense_Mutation      | c.196G>A    | p.G66S         | 0.106195  |
| OR4S2        | 11         | 55419037       | 55419037     | Missense_Mutation      | c.658C>A    | p.L220I        | 0.103825  |
| BSCL2        | 11         | 62459926       | 62459926     | Missense_Mutation      | c.593C>T    | p.A198V        | 0.081633  |
| LTBP3        | 11         | 65320345       | 65320345     | Missense_Mutation      | c.1172G>A   | p.R391H        | 0.095808  |
| TBX10        | 11         | 67399247       | 67399247     | Missense_Mutation      | c.987C>G    | p.S329R        | 0.181818  |
| TSKU         | 11         | 76507325       | 76507325     | Missense_Mutation      | c.665C>T    | p.P222L        | 0.072917  |
| TYR          | 11         | 88924442       | 88924442     | Missense_Mutation      | c.892C>T    | p.R298W        | 0.122995  |
| LOC100288778 | 12         | 90650          | 90650        | Missense_Mutation      | c.656A>G    | p.H219R        | 0.136364  |
| Unknown      | 12         | 92000          | 92000        | Missense_Mutation      | c.310T>A    | p.L104M        | 0.185185  |
| Unknown      | 12         | 92018          | 92018        | Missense_Mutation      | c.292A>G    | p.S98G         | 0.09375   |
| CD163L1      | 12         | 7551154        | 7551154      | Missense_Mutation      | c.1435G>T   | p.V479F        | 0.068571  |
| A2M          | 12         | 9265958        | 9265958      | Missense_Mutation      | c.268G>A    | p.A90T         | 0.082474  |
| DDX11        | 12         | 31237922       | 31237922     | Missense_Mutation      | c.500G>C    | p.R167T        | 0.172414  |
| NUP107       | 12         | 69135678       | 69135678     | Missense_Mutation      | c.2588C>T   | p.T863M        | 0.122807  |
| E2F7         | 12         | 77417806       | 77417806     | Missense_Mutation      | c.2725G>A   | p.G909S        | 0.11236   |
| PLEKHG7      | 12         | 93157951       | 93157951     | Missense_Mutation      | c.915T>G    | p.I305M        | 0.081633  |
| TTC7B        | 14         | 91252634       | 91252634     | Missense_Mutation      | c.160G>A    | p.E54K         | 0.052632  |
| ATPBD4       | 15         | 35834681       | 35834681     | Missense_Mutation      | c.51G>A     | p.M17I         | 0.129032  |
| TBC1D2B      | 15         | 78290635       | 78290635     | Missense_Mutation      | c.2759G>A   | p.R920Q        | 0.111111  |
| CLEC18C      | 16         | 70218491       | 70218491     | Missense_Mutation      | c.1079T>C   | p.I360T        | 1         |
| TP53         | 17         | 7578393        | 7578393      | Missense_Mutation      | c.537T>G    | p.H179Q        | 0.152174  |
| PRPSAP2      | 17         | 18793162       | 18793162     | Missense_Mutation      | c.556G>T    | p.V186L        | 0.140741  |
| MYO1D        | 17         | 31048183       | 31048183     | Missense_Mutation      | c.1771A>C   | p.K591Q        | 0.09596   |
| DCC          | 18         | 51013172       | 51013172     | Missense_Mutation      | c.3742G>A   | p.V1248M       | 0.13369   |
| FCGBP        | 19         | 40363188       | 40363188     | Missense_Mutation      | c.14882G>A  | p.R4961Q       | 0.072165  |
| CCDC8        | 19         | 46915802       | 46915802     | Missense_Mutation      | c.266C>T    | p.P89L         | 0.106742  |
| VIT          | 2          | 36970284       | 36970284     | Missense_Mutation      | c.160A>G    | p.I54V         | 0.125     |
| MAP1D        | 2          | 172928445      | 172928445    | Missense_Mutation      | c.205A>C    | p.K69Q         | 0.145161  |

|          |    |           |           |                   |           |          |          |
|----------|----|-----------|-----------|-------------------|-----------|----------|----------|
| TTC30B   | 2  | 178416842 | 178416842 | Missense_Mutation | c.650G>A  | p.R217H  | 0.059211 |
| TTN      | 2  | 179636076 | 179636076 | Missense_Mutation | c.7978C>T | p.P2660S | 0.08209  |
| CXCR2P1  | 2  | 218925687 | 218925687 | Missense_Mutation | c.34C>T   | p.R12C   | 0.076923 |
| ALPP     | 2  | 233246399 | 233246399 | Missense_Mutation | c.1502C>G | p.P501R  | 0.113636 |
| OVOL2    | 20 | 18022218  | 18022218  | Missense_Mutation | c.471C>G  | p.N157K  | 0.079208 |
| ARFGAP1  | 20 | 61917793  | 61917793  | Missense_Mutation | c.910A>T  | p.S304C  | 0.121622 |
| CHEK2    | 22 | 29091840  | 29091840  | Missense_Mutation | c.1117A>G | p.K373E  | 0.043478 |
| TRIM42   | 3  | 140397391 | 140397391 | Missense_Mutation | c.320G>A  | p.R107H  | 0.077778 |
| PIK3CA   | 3  | 178952072 | 178952072 | Missense_Mutation | c.3127A>G | p.M1043V | 0.128492 |
| ZNF141   | 4  | 367455    | 367455    | Missense_Mutation | c.1229G>A | p.R410Q  | 0.070588 |
| SPATA5   | 4  | 123857311 | 123857311 | Missense_Mutation | c.1334G>A | p.R445Q  | 0.126437 |
| SDHAP3   | 5  | 1593264   | 1593264   | Missense_Mutation | c.196G>A  | p.A66T   | 0.134615 |
| PSD2     | 5  | 139221863 | 139221863 | Missense_Mutation | c.2120G>A | p.R707H  | 0.075269 |
| MUC17    | 7  | 100683801 | 100683801 | Missense_Mutation | c.9104G>A | p.G3035D | 0.136364 |
| NUP214   | 9  | 134025736 | 134025736 | Missense_Mutation | c.2066C>T | p.A689V  | 0.094595 |
| TUBBP5   | 9  | 141071154 | 141071154 | Missense_Mutation | c.557T>C  | p.V186A  | 0.096386 |
| TUBBP5   | 9  | 141071195 | 141071195 | Missense_Mutation | c.598C>T  | p.P200S  | 0.149123 |
| XPNPEP2  | X  | 128901598 | 128901598 | Missense_Mutation | c.1760C>T | p.T587I  | 0.166667 |
| MLL4     | 19 | 36214821  | 36214821  | Nonsense_Mutation | c.3247C>T | p.R1083* | 0.083333 |
| MAP4K1   | 19 | 39100635  | 39100635  | Nonsense_Mutation | c.841C>T  | p.R281*  | 0.094891 |
| NAT8B    | 2  | 73928312  | 73928312  | Nonsense_Mutation | c.121C>T  | p.R41*   | 0.080214 |
| NBPF14   | 1  | 148004525 | 148004525 | 3'UTR             |           |          | 0.102439 |
| FAM22A   | 10 | 88994492  | 88994492  | 3'UTR             |           |          | 1        |
| FAM22A   | 10 | 88994534  | 88994534  | 3'UTR             |           |          | 1        |
| CXADRP2  | 15 | 22015940  | 22015940  | 3'UTR             |           |          | 0.138889 |
| FLJ35220 | 17 | 78410119  | 78410119  | 3'UTR             |           |          | 0.333333 |
| CCRN4L   | 4  | 139966663 | 139966663 | 3'UTR             |           |          | 0.159091 |
| CYP21A2  | 6  | 31975463  | 31975463  | 3'UTR             |           |          | 0.102564 |
| FAM46A   | 6  | 82459344  | 82459344  | 3'UTR             |           |          | 0.108108 |
| Unknown  | 9  | 84675669  | 84675669  | 3'UTR             |           |          | 0.092784 |
| Unknown  | 15 | 102297229 | 102297229 | 5'Flank           |           |          | 1        |
| SLCO1B3  | 12 | 20968655  | 20968655  | 5'UTR             |           |          | 0.25     |
| GOLGA8E  | 15 | 23438847  | 23438847  | 5'UTR             |           |          | 1        |
| RGPD4    | 2  | 108443438 | 108443438 | 5'UTR             |           |          | 0.153846 |
| LYPLA2P1 | 6  | 33334078  | 33334078  | 5'UTR             |           |          | 0.078947 |
| KCNK5    | 6  | 39196946  | 39196946  | 5'UTR             |           |          | 0.125    |
| MAGEA3   | X  | 151936356 | 151936356 | 5'UTR             |           |          | 1        |
| CCDC30   | 1  | 43055286  | 43055286  | Intron            |           |          | 0.115385 |
| KIAA0907 | 1  | 155884143 | 155884143 | Intron            |           |          | 0.26087  |
| CSTF3    | 11 | 33163119  | 33163119  | Intron            |           |          | 0.210526 |
| ITGB7    | 12 | 53591255  | 53591255  | Intron            |           |          | 0.084507 |

|           |    |           |           |        |            |           |          |
|-----------|----|-----------|-----------|--------|------------|-----------|----------|
| Unknown   | 15 | 20644688  | 20644688  | Intron |            |           | 0.137931 |
| CDRT1     | 17 | 15502013  | 15502013  | Intron |            |           | 0.105263 |
| LOC644165 | 22 | 25043098  | 25043098  | Intron |            |           | 0.070423 |
| SERHL2    | 22 | 42969919  | 42969919  | Intron |            |           | 0.103704 |
| CPSF1     | 8  | 145620789 | 145620789 | Intron |            |           | 0.25     |
| LOC642846 | 12 | 9458891   | 9458891   | RNA    | c.1928A>G  |           | 0.157895 |
| LOC374491 | 13 | 25144704  | 25144704  | RNA    | c.245T>C   |           | 0.194444 |
| GOLGA6L5  | 15 | 85059998  | 85059998  | RNA    | c.81C>T    |           | 1        |
| Unknown   | 16 | 70268080  | 70268080  | RNA    | c.335A>G   |           | 0.157895 |
| Unknown   | 16 | 70268158  | 70268158  | RNA    | c.257T>G   |           | 0.148148 |
| Unknown   | 9  | 67793910  | 67793910  | RNA    | c.1744G>A  |           | 1        |
| Unknown   | 9  | 135895805 | 135895805 | RNA    | c.9G>T     |           | 0.090909 |
| VPS13D    | 1  | 12516089  | 12516089  | Silent | c.12369G>A | p.T4123T  | 0.066667 |
| NBPF10    | 1  | 145360624 | 145360624 | Silent | c.9474G>A  | p.S3158S  | 0.190476 |
| OR5L2     | 11 | 55595474  | 55595474  | Silent | c.780C>T   | p.C260C   | 0.201087 |
| MMAB      | 12 | 109996930 | 109996930 | Silent | c.615C>T   | p.T205T   | 0.104348 |
| PCDH9     | 13 | 67800215  | 67800215  | Silent | c.2358C>T  | p.D786D   | 0.165775 |
| HDAC5     | 17 | 42160973  | 42160973  | Silent | c.2403G>A  | p.V801V   | 0.071429 |
| TTN       | 2  | 179486278 | 179486278 | Silent | c.37569C>T | p.N12523N | 0.081633 |
| CHRNA4    | 20 | 61981485  | 61981485  | Silent | c.1278C>T  | p.S426S   | 0.142857 |
| ATG7      | 3  | 11382147  | 11382147  | Silent | c.918G>A   | p.K306K   | 0.098901 |
| LRRC31    | 3  | 169572686 | 169572686 | Silent | c.906G>A   | p.S302S   | 0.1125   |
| SDHAP2    | 3  | 195410640 | 195410640 | Silent | c.537T>C   | p.Y179Y   | 0.073171 |
| C5orf49   | 5  | 7850994   | 7850994   | Silent | c.141G>A   | p.P47P    | 0.086957 |
| WASF1     | 6  | 110424661 | 110424661 | Silent | c.813A>G   | p.V271V   | 0.098958 |
| SYNJ2     | 6  | 158454679 | 158454679 | Silent | c.678C>T   | p.D226D   | 0.054645 |
| ALG2      | 9  | 101980369 | 101980369 | Silent | c.1098G>A  | p.P366P   | 0.054348 |
| CACNA1F   | X  | 49084827  | 49084827  | Silent | c.900C>T   | p.R300R   | 0.093023 |

## 90 HN6431 (PIK3CA WT)

| Hugo_Symbol | Chromosome | Start_position | End_position | Variant_Classification | cDNA_Change | Protein_Change | i_tumor_f |
|-------------|------------|----------------|--------------|------------------------|-------------|----------------|-----------|
| PRAMEF22    | 1          | 13035545       | 13035545     | Missense_Mutation      | c.3G>C      | p.M1I          | 1         |
| AKR7A3      | 1          | 19612764       | 19612764     | Missense_Mutation      | c.317G>A    | p.R106Q        | 0.115183  |
| PTP4A2      | 1          | 32377362       | 32377362     | Missense_Mutation      | c.255A>T    | p.L85F         | 0.181287  |
| SLFNL1      | 1          | 41483450       | 41483450     | Missense_Mutation      | c.814C>T    | p.R272C        | 0.147929  |
| PPCS        | 1          | 42922346       | 42922346     | Missense_Mutation      | c.110T>G    | p.V37G         | 0.236842  |
| LEPR        | 1          | 66067341       | 66067341     | Missense_Mutation      | c.1261C>T   | p.R421C        | 0.163462  |
| CSF1        | 1          | 110466000      | 110466000    | Missense_Mutation      | c.757C>T    | p.P253S        | 0.13245   |
| ANXA9       | 1          | 150956535      | 150956535    | Missense_Mutation      | c.257G>A    | p.R86H         | 0.073171  |
| ASH1L       | 1          | 155450764      | 155450764    | Missense_Mutation      | c.1897G>T   | p.V633L        | 0.162651  |
| SLAMF1      | 1          | 160607290      | 160607290    | Missense_Mutation      | c.106C>A    | p.L36I         | 0.117647  |
| RC3H1       | 1          | 173952657      | 173952657    | Missense_Mutation      | c.491G>A    | p.R164Q        | 0.100719  |
| FMN2        | 1          | 240371009      | 240371009    | Missense_Mutation      | c.2897T>C   | p.L966P        | 0.103093  |
| PARG        | 10         | 51093329       | 51093329     | Missense_Mutation      | c.1750G>A   | p.A584T        | 0.03937   |
| NCOA4       | 10         | 51580587       | 51580587     | Missense_Mutation      | c.173G>A    | p.R58H         | 0.12      |
| HRAS        | 11         | 534289         | 534289       | Missense_Mutation      | c.34G>A     | p.G12S         | 0.144144  |
| MUC5B       | 11         | 1269115        | 1269115      | Missense_Mutation      | c.12589G>A  | p.G4197S       | 0.110236  |
| OR4A5       | 11         | 51411686       | 51411686     | Missense_Mutation      | c.710G>T    | p.C237F        | 0.160221  |
| OR5W2       | 11         | 55681455       | 55681455     | Missense_Mutation      | c.604G>A    | p.V202I        | 0.150289  |
| SAPS3       | 11         | 68312482       | 68312482     | Missense_Mutation      | c.404A>T    | p.K135I        | 0.128378  |
| KBTBD3      | 11         | 105923623      | 105923623    | Missense_Mutation      | c.1793A>C   | p.Q598P        | 0.116279  |
| TMEM132B    | 12         | 126138806      | 126138806    | Missense_Mutation      | c.2787A>T   | p.K929N        | 0.134715  |
| CDK8        | 13         | 26959417       | 26959417     | Missense_Mutation      | c.584T>C    | p.V195A        | 0.141593  |
| RNF219      | 13         | 79189852       | 79189852     | Missense_Mutation      | c.2044C>G   | p.L682V        | 0.233503  |
| SLITRK5     | 13         | 88328944       | 88328944     | Missense_Mutation      | c.1301G>A   | p.G434E        | 0.125874  |
| JUB         | 14         | 23444276       | 23444276     | Missense_Mutation      | c.1277G>A   | p.C426Y        | 0.105263  |
| MKRN3       | 15         | 23811363       | 23811363     | Missense_Mutation      | c.434C>T    | p.T145M        | 0.145161  |
| IQCH        | 15         | 67709344       | 67709344     | Missense_Mutation      | c.2173C>T   | p.R725W        | 0.128713  |
| Unknown     | 16         | 28354457       | 28354457     | Missense_Mutation      | c.695C>T    | p.P232L        | 0.09375   |
| PRSS53      | 16         | 31097782       | 31097782     | Missense_Mutation      | c.539G>A    | p.R180H        | 0.15      |
| CSF3        | 17         | 38172072       | 38172072     | Missense_Mutation      | c.169G>A    | p.D57N         | 0.139535  |
| KRTAP4-7    | 17         | 39240627       | 39240627     | Missense_Mutation      | c.169T>C    | p.S57P         | 0.099415  |
| CUEDC1      | 17         | 55946537       | 55946537     | Missense_Mutation      | c.886C>T    | p.P296S        | 0.135802  |
| BCAS3       | 17         | 58967129       | 58967129     | Missense_Mutation      | c.735C>G    | p.N245K        | 0.166667  |
| C17orf28    | 17         | 72948430       | 72948430     | Missense_Mutation      | c.2078C>T   | p.P693L        | 0.132075  |
| TMEM200C    | 18         | 5891942        | 5891942      | Missense_Mutation      | c.121G>T    | p.V41L         | 0.106667  |
| ANKRD30B    | 18         | 14851970       | 14851970     | Missense_Mutation      | c.3670T>A   | p.Y1224N       | 0.131579  |
| DCC         | 18         | 50278661       | 50278661     | Missense_Mutation      | c.329C>T    | p.P110L        | 0.12426   |
| POLRMT      | 19         | 622886         | 622886       | Missense_Mutation      | c.1390C>T   | p.R464W        | 0.487179  |
| MUC16       | 19         | 9003333        | 9003333      | Missense_Mutation      | c.40102G>A  | p.V13368I      | 0.418919  |



|           |    |           |           |                   |               |               |          |
|-----------|----|-----------|-----------|-------------------|---------------|---------------|----------|
| DNMT1     | 19 | 10265093  | 10265093  | Missense_Mutation | c.1847C>T     | p.T616M       | 0.401042 |
| SMARCA4   | 19 | 11141427  | 11141427  | Missense_Mutation | c.3404G>A     | p.R1135Q      | 0.290323 |
| ZNF233    | 19 | 44778750  | 44778750  | Missense_Mutation | c.1937A>C     | p.K646T       | 0.394444 |
| VSTM1     | 19 | 54544333  | 54544333  | Missense_Mutation | c.593C>T      | p.T198M       | 0.459459 |
| MYT1L     | 2  | 1843078   | 1843078   | Missense_Mutation | c.2923G>A     | p.A975T       | 0.162921 |
| CTNNA2    | 2  | 79971609  | 79971609  | Missense_Mutation | c.199G>A      | p.A67T        | 0.135922 |
| PPIG      | 2  | 170489726 | 170489726 | Missense_Mutation | c.986C>A      | p.S329Y       | 0.13913  |
| TTN       | 2  | 179528398 | 179528398 | Missense_Mutation | c.926C>T      | p.A309V       | 0.177885 |
| TTN       | 2  | 179605415 | 179605415 | Missense_Mutation | c.12032A>G    | p.E4011G      | 0.113514 |
| HDAC4     | 2  | 240003803 | 240003803 | Missense_Mutation | c.2632G>T     | p.D878Y       | 0.108247 |
| SEC61A1   | 3  | 127786268 | 127786268 | Missense_Mutation | c.980C>T      | p.T327M       | 0.205556 |
| SPATA16   | 3  | 172835185 | 172835185 | Missense_Mutation | c.337C>A      | p.P113T       | 0.154867 |
| WDR1      | 4  | 10083028  | 10083028  | Missense_Mutation | c.1237G>A     | p.V413I       | 0.16     |
| WDR19     | 4  | 39245929  | 39245929  | Missense_Mutation | c.2483G>A     | p.R828H       | 0.147059 |
| PCDH10    | 4  | 134071698 | 134071698 | Missense_Mutation | c.403G>A      | p.A135T       | 0.1      |
| GUSBP1    | 5  | 21491446  | 21491446  | Missense_Mutation | c.192G>T      | p.Q64H        | 0.209302 |
| C5orf34   | 5  | 43506091  | 43506091  | Missense_Mutation | c.691C>T      | p.H231Y       | 0.109375 |
| GRAMD3    | 5  | 125813462 | 125813462 | Missense_Mutation | c.565G>T      | p.A189S       | 0.137363 |
| CSF1R     | 5  | 149459795 | 149459795 | Missense_Mutation | c.412G>A      | p.V138I       | 0.132743 |
| ADAMTS2   | 5  | 178562959 | 178562959 | Missense_Mutation | c.2036G>A     | p.R679H       | 0.070423 |
| HIST1H3H  | 6  | 27777869  | 27777869  | Missense_Mutation | c.18G>T       | p.Q6H         | 0.157609 |
| DNAH8     | 6  | 38775449  | 38775449  | Missense_Mutation | c.2563C>T     | p.R855W       | 0.126437 |
| C6orf150  | 6  | 74135219  | 74135219  | Missense_Mutation | c.1300T>C     | p.S434P       | 0.207317 |
| C6orf191  | 6  | 130166922 | 130166922 | Missense_Mutation | c.109G>A      | p.V37M        | 0.132075 |
| PCLO      | 7  | 82764239  | 82764239  | Missense_Mutation | c.2627C>T     | p.P876L       | 0.110553 |
| MUC17     | 7  | 100676343 | 100676343 | Missense_Mutation | c.1646G>A     | p.S549N       | 0.246231 |
| ZNF282    | 7  | 148907754 | 148907754 | Missense_Mutation | c.910C>T      | p.R304W       | 0.151515 |
| CSMD1     | 8  | 3267060   | 3267060   | Missense_Mutation | c.1632C>G     | p.F544L       | 0.222222 |
| DLC1      | 8  | 12958063  | 12958063  | Missense_Mutation | c.1783C>T     | p.R595C       | 0.151163 |
| LZTS1     | 8  | 20107511  | 20107511  | Missense_Mutation | c.1513G>A     | p.E505K       | 0.171123 |
| KCNQ3     | 8  | 133196535 | 133196535 | Missense_Mutation | c.557G>T      | p.G186V       | 0.116402 |
| C8orf73   | 8  | 144650361 | 144650361 | Missense_Mutation | c.1715T>C     | p.V572A       | 0.142857 |
| FREM1     | 9  | 14808085  | 14808085  | Missense_Mutation | c.2941G>C     | p.V981L       | 0.173653 |
| FAM75A2   | 9  | 39357770  | 39357770  | Missense_Mutation | c.263C>G      | p.P88R        | 1        |
| FAM189A2  | 9  | 72006659  | 72006659  | Missense_Mutation | c.1292G>A     | p.R431Q       | 0.131148 |
| IARS      | 9  | 95004436  | 95004436  | Missense_Mutation | c.3177G>C     | p.Q1059H      | 0.136095 |
| NLGN3     | X  | 70367763  | 70367763  | Missense_Mutation | c.164G>A      | p.R55Q        | 0.291667 |
| ARHGAP11B | 15 | 30938316  | 30938316  | Splice_Site       | c.1127_splice |               | 0.080645 |
| C20orf194 | 20 | 3295768   | 3295768   | Splice_Site       | c.1591_splice | p.G531_splice | 0.121212 |
| C21orf99  | 21 | 14437495  | 14437495  | Splice_Site       | c.2166_splice |               | 0.259259 |
| ZMAT4     | 8  | 40554763  | 40554763  | Splice_Site       | c.349_splice  | p.A117_splice | 0.109948 |

|           |    |           |           |                   |            |          |          |
|-----------|----|-----------|-----------|-------------------|------------|----------|----------|
| TP73      | 1  | 3599708   | 3599708   | Silent            | c.150C>T   | p.D50D   | 0.122995 |
| C1orf175  | 1  | 55175809  | 55175809  | Silent            | c.3921C>T  | p.R1307R | 0.217391 |
| EPHX4     | 1  | 92528795  | 92528795  | Silent            | c.1041C>T  | p.N347N  | 0.16092  |
| KCNA2     | 1  | 111146157 | 111146157 | Silent            | c.1248C>T  | p.F416F  | 0.085427 |
| SMNDC1    | 10 | 112055010 | 112055010 | Silent            | c.555C>T   | p.A185A  | 0.072581 |
| TMEM216   | 11 | 61161357  | 61161357  | Silent            | c.117T>G   | p.G39G   | 0.173913 |
| GRIN2B    | 12 | 13716227  | 13716227  | Silent            | c.3945C>T  | p.A1315A | 0.162921 |
| SOX5      | 12 | 23696176  | 23696176  | Silent            | c.1740C>T  | p.D580D  | 0.099476 |
| WSCD2     | 12 | 108620880 | 108620880 | Silent            | c.918G>A   | p.A306A  | 0.125683 |
| TBX3      | 12 | 115112081 | 115112081 | Silent            | c.1659C>T  | p.V553V  | 0.384615 |
| ZNF592    | 15 | 85345396  | 85345396  | Silent            | c.3576G>A  | p.A1192A | 0.170213 |
| MVP       | 16 | 29853138  | 29853138  | Silent            | c.1413C>T  | p.Y471Y  | 0.089888 |
| ITGA2B    | 17 | 42463013  | 42463013  | Silent            | c.480C>T   | p.S160S  | 0.0625   |
| SLC17A9   | 20 | 61597910  | 61597910  | Silent            | c.1095G>A  | p.P365P  | 0.162162 |
| IFNGR2    | 21 | 34809233  | 34809233  | Silent            | c.978G>A   | p.P326P  | 0.12     |
| NBEAL2    | 3  | 47046506  | 47046506  | Silent            | c.6339C>T  | p.L2113L | 0.172414 |
| FXR1      | 3  | 180688142 | 180688142 | Silent            | c.1599G>T  | p.G533G  | 0.119497 |
| GABRB1    | 4  | 47034444  | 47034444  | Silent            | c.183C>T   | p.V61V   | 0.125    |
| DDX60L    | 4  | 169315637 | 169315637 | Silent            | c.3789C>T  | p.L1263L | 0.15942  |
| GRM1      | 6  | 146350827 | 146350827 | Silent            | c.174G>A   | p.P58P   | 0.149068 |
| LRRC17    | 7  | 102580025 | 102580025 | Silent            | c.921C>T   | p.I307I  | 0.116402 |
| CYP4Z2P   | 1  | 47325212  | 47325212  | RNA               | c.1356C>T  |          | 0.291667 |
| LOC653113 | 12 | 8384474   | 8384474   | RNA               | c.1314G>A  |          | 0.136842 |
| ADAM6     | 14 | 106054585 | 106054585 | RNA               | c.62901G>T |          | 0.110169 |
| Unknown   | 15 | 28900606  | 28900606  | RNA               | c.537C>T   |          | 0.203704 |
| GGT8P     | 2  | 91969071  | 91969071  | RNA               | c.1402T>C  |          | 0.108696 |
| Unknown   | 21 | 15278157  | 15278157  | RNA               | c.5G>A     |          | 0.157895 |
| Unknown   | 21 | 15278172  | 15278172  | RNA               | c.20T>C    |          | 0.190476 |
| LOC348926 | 4  | 3948744   | 3948744   | RNA               | c.1591C>T  |          | 0.181818 |
| SFRS15    | 21 | 33065709  | 33065709  | Nonsense_Mutation | c.1411C>T  | p.R471*  | 0.151079 |
| SFRS15    | 21 | 33068512  | 33068512  | Nonsense_Mutation | c.982C>T   | p.Q328*  | 0.162304 |
| ACSL6     | 5  | 131329909 | 131329909 | Nonsense_Mutation | c.10C>T    | p.Q4*    | 0.137931 |
| TIE1      | 1  | 43772707  | 43772707  | Intron            |            |          | 0.128571 |
| PDE4DIP   | 1  | 144863505 | 144863505 | Intron            |            |          | 0.086957 |
| NBPF15    | 1  | 148574712 | 148574712 | Intron            |            |          | 1        |
| CLEC7A    | 12 | 10279991  | 10279991  | Intron            |            |          | 0.139535 |
| GOLGA6L10 | 15 | 82932487  | 82932487  | Intron            |            |          | 1        |
| GOLGA6L10 | 15 | 82932518  | 82932518  | Intron            |            |          | 1        |
| USP31     | 16 | 23085242  | 23085242  | Intron            |            |          | 0.23913  |
| SPON2     | 4  | 1164130   | 1164130   | Intron            |            |          | 0.133333 |
| Unknown   | 7  | 142206745 | 142206745 | Intron            |            |          | 0.12766  |

|          |    |           |           |         |  |  |          |
|----------|----|-----------|-----------|---------|--|--|----------|
| GALNT11  | 7  | 151800369 | 151800369 | Intron  |  |  | 0.123077 |
| ZBED1    | X  | 2418415   | 2418415   | Intron  |  |  | 0.3      |
| FAM104B  | X  | 55172471  | 55172471  | Intron  |  |  | 0.24     |
| PCGF2    | 17 | 36896673  | 36896673  | 5'UTR   |  |  | 0.177778 |
| SDHAP1   | 3  | 195706728 | 195706728 | 5'UTR   |  |  | 0.076923 |
| GYPE     | 4  | 144826679 | 144826679 | 5'UTR   |  |  | 0.064748 |
| CAMK2A   | 5  | 149669266 | 149669266 | 5'UTR   |  |  | 0.229167 |
| ATF6B    | 6  | 32095996  | 32095996  | 5'UTR   |  |  | 0.325581 |
| MRPS10   | 6  | 42185632  | 42185632  | 5'UTR   |  |  | 0.111111 |
| FOXO4L5  | 9  | 70181379  | 70181379  | 5'Flank |  |  | 1        |
| NBPF14   | 1  | 148004475 | 148004475 | 3'UTR   |  |  | 0.157895 |
| PLA2G4A  | 1  | 186957696 | 186957696 | 3'UTR   |  |  | 0.19403  |
| GOLGA8G  | 15 | 28634298  | 28634298  | 3'UTR   |  |  | 1        |
| C17orf97 | 17 | 263918    | 263918    | 3'UTR   |  |  | 0.147208 |
| GPS2     | 17 | 7215990   | 7215990   | 3'UTR   |  |  | 0.285714 |
| STRADB   | 2  | 202344965 | 202344965 | 3'UTR   |  |  | 0.03876  |
| ARF4     | 3  | 57557905  | 57557905  | 3'UTR   |  |  | 0.166667 |
| SDHAP1   | 3  | 195690149 | 195690149 | 3'UTR   |  |  | 0.230769 |
| SDHAP1   | 3  | 195690163 | 195690163 | 3'UTR   |  |  | 0.263158 |
| F13A1    | 6  | 6145758   | 6145758   | 3'UTR   |  |  | 0.083333 |
| C6orf168 | 6  | 99729009  | 99729009  | 3'UTR   |  |  | 0.139535 |
| RLIM     | X  | 73802892  | 73802892  | 3'UTR   |  |  | 0.076087 |

91

92 **Supplementary Table 5. Interactions of *PIK3CA* non-canonical mutations across**  
 93 **autoinhibited structures of the PI3K $\alpha$  heterodimer**  
 94 Mutations are colored in red or blue according to their function (activating vs non-activating,  
 95 respectively). Interacting residues are colored according to their domains: ABD in yellow, Linkers  
 96 in light grey, C2 in blue, HD in pink and KD in violet, while the p85 subunit is in dark grey.  
 97 Interactions involving the protein backbone are denoted with “bb”.

| Mutation<br>(PIK3CA) | 4L23<br>(PIK3R1) | 4L23<br>(PIK3CA)                   | 4OVV                               | 4OVU                               | 4L1B                               | 4L2Y                               | 5XGI                               | Interaction                                  |
|----------------------|------------------|------------------------------------|------------------------------------|------------------------------------|------------------------------------|------------------------------------|------------------------------------|----------------------------------------------|
| V71I                 |                  | I69, I102,                         | I102,                              | I102,                              | I69, I102,                         | I69, I102,                         | I69, I102,                         | Hydrophobic network                          |
| Q75E                 |                  | G8, S7<br>unmodeled                | S7                                 | G8                                 | G8, S7<br>unmodeled                | G8, S7<br>unmodeled                | G8, S7<br>unmodeled                | Hydrogen bond                                |
| E81K                 |                  | K111                               | N/A                                | N/A                                | K111                               | K111                               | K111                               | Salt-bridge                                  |
| R88Q                 |                  | D746                               | D746                               | D746                               | D746                               | D746                               | E39 or<br>D743                     | Salt-bridge                                  |
| P104L                |                  | I69, F83                           | Hydrophobic network                          |
| E110del              |                  | S306                               | surface                            | surface                            | S306                               | S306                               | S306                               | Hydrogen bond/<br>surface exposed            |
| K111E/N              |                  | E81                                | bb-M304                            | surface                            | E81                                | E81                                | E81                                | Salt-bridge/Hydrogen<br>bond/surface exposed |
| W328S                |                  | F486,<br>P487, I492                | F486,<br>P487, I492                | F486, P487,<br>I492                | F486, P487,<br>I492                | F486, P487,<br>I492                | F486, P487,<br>I492                | Hydrophobic network                          |
| R335G                |                  | surface                            | surface                            | surface                            | surface                            | surface                            | surface                            | Surface exposed                              |
| V344G                |                  | V346, I354,<br>W383,<br>I406, L422 | Hydrophobic network                          |
| N345K                | N564             |                                    | N564                               | N564                               | N564                               | N564                               | N564                               | Hydrogen bond                                |

|       |         |                                                   |                                                   |                                                   |                                                   |                                                   |                                                   |                                               |
|-------|---------|---------------------------------------------------|---------------------------------------------------|---------------------------------------------------|---------------------------------------------------|---------------------------------------------------|---------------------------------------------------|-----------------------------------------------|
| G363A |         | R401                                              | N/A                                               | N/A                                               | R401                                              | R401                                              | R401                                              | Hydrogen bond                                 |
| E365V |         | N377                                              | N377                                              | bb-L367,<br>bb-K374                               | N377                                              | N377                                              | N377                                              | Hydrogen bond                                 |
| E418K | K575    |                                                   | bb-V409,<br>p110 loop:<br>K410-E417<br>unmodeled  | p110 loop:<br>K410-415A<br>unmodeled              | K575                                              | K575                                              | K575                                              | Salt-bridge/<br>Hydrogen bond                 |
| C420R | P568    |                                                   | P568                                              | P568                                              | P568                                              | P568                                              | P568                                              | Van der Waals                                 |
| E453K | R574    |                                                   | bb-L570                                           | K567                                              | R574                                              | R574                                              | R574                                              | Salt-bridge/<br>Hydrogen bond                 |
| G451R |         | bb-P449                                           | bb-P449                                           | bb-P449                                           | bb-P449                                           | bb-P449                                           | bb-P449                                           | Hydrogen bond                                 |
| R519G |         | surface                                           | unmodeled                                         | N/A                                               | unmodeled                                         | unmodeled                                         | Surface                                           | Surface-exposed/<br>salt-bridge               |
| Q546R | bb-K382 |                                                   | bb-K382                                           | bb-K382                                           | bb-K382                                           | bb-K382                                           | bb-K382                                           | Hydrogen bond                                 |
| C604R |         | I459,<br>L1006,<br>F1016                          | I459,<br>L1006,<br>F1016                          | I459,<br>L1006,<br>F1016                          | I459,<br>L1006,<br>F1016                          | I459,<br>L1006,<br>F1016                          | I459,<br>L1006,<br>F1016                          | Hydrophobic network                           |
| Y606C |         | bb-P566                                           | E600                                              | bb-P566 or<br>E600                                | bb-P566                                           | bb-P566                                           | bb-P566                                           | Hydrogen bond                                 |
| E726K |         | surface                                           | surface                                           | surface                                           | surface                                           | surface                                           | surface                                           | Surface exposed at<br>lipid binding interface |
| C901F |         | F897, L929,<br>F954, L956,<br>F960, I964,<br>F980 | Hydrophobic network                           |
| C905S |         | V952,<br>L956, F980,<br>C984,                     | V952,<br>L956, F980,<br>C984,                     | V952, L956,<br>F980, C984,<br>W1051,<br>M1043     | V952, L956,<br>F980, C984,<br>W1051,<br>M1043     | V952, L956,<br>F980, C984,<br>W1051,<br>M1043     | V952, L956,<br>F980, C984,<br>W1051,<br>M1043     | Hydrophobic network                           |

|         |  |                                            |                                            |                                            |                                            |                                            |                                            |                                               |
|---------|--|--------------------------------------------|--------------------------------------------|--------------------------------------------|--------------------------------------------|--------------------------------------------|--------------------------------------------|-----------------------------------------------|
|         |  | W1051,<br>M1043                            | W1051,<br>M1043                            |                                            |                                            |                                            |                                            |                                               |
| E970K   |  | surface                                    | surface                                    | surface                                    | surface                                    | surface                                    | surface                                    | Surface exposed at<br>lipid binding interface |
| C971R   |  | surface                                    | surface                                    | surface                                    | surface                                    | surface                                    | surface                                    | Surface exposed at<br>lipid binding interface |
| R975S   |  | surface                                    | surface                                    | surface                                    | surface                                    | surface                                    | surface                                    | Surface exposed                               |
| G1007R  |  | Y641                                       | Y641                                       | Y641                                       | Y641                                       | Y641                                       | Y641                                       | Hydrogen bond                                 |
| M1040I  |  | surface                                    | surface                                    | surface                                    | surface                                    | surface                                    | surface                                    | Surface exposed                               |
| M1043V  |  | C905,<br>V952,<br>F909,<br>F1039,<br>W1051 | C905,<br>V952,<br>F909,<br>F1039,<br>W1051 | C905,<br>V952,<br>F909,<br>F1039,<br>W1051 | C905,<br>V952,<br>F909,<br>F1039,<br>W1051 | C905,<br>V952,<br>F909,<br>F1039,<br>W1051 | C905,<br>V952,<br>F909,<br>F1039,<br>W1051 | Hydrophobic network                           |
| N1068fs |  | unmodeled                                  | unmodeled                                  | unmodeled                                  | unmodeled                                  | unmodeled                                  | unmodeled                                  | N/A                                           |

98

99

100 **Supplementary methods**

101 **Cell culture**

102 PCI-52-SD1 cell line was obtained by clonal selection of the parental PCI-52 cell line  
103 (University of Pittsburgh Cancer Institute) by rounds of graded serum selection. Generation of the  
104 serum-dependent PCI-52-SD1 cell line has been previously described(1). Cells were maintained in  
105 complete Dulbecco's Modified Eagle's Medium (DMEM) (Corning, 10-013-CM) with 10% fetal  
106 bovine serum (FBS) (Gemini, 900-108) and 1% penicillin/streptomycin (Gibco, 15140-122). Cells  
107 engineered to express WT or mutant *PIK3CA* were cultured in complete DMEM containing 0.25  
108 µg/mL puromycin. Cells were maintained at 37 °C and 5% CO<sub>2</sub>. Cells were authenticated by the  
109 University of California, Berkeley Cell Culture Facility using the Short Tandem Repeat (STR)  
110 method and tested for mycoplasma using PCR detection kit (Sigma, MP0035).

111

112 **Chemicals and antibodies**

113 Puromycin was from InvivoGen (ant-pr-1) and doxycycline from Cayman (24390-14-5).  
114 Antibodies recognizing p-AKT S473 (Rabbit mAb, #4060L), AKT (Rabbit mAb, #4685S),  
115 GAPDH (Rabbit mAb, 2118L) were from Cell Signaling Technology. Anti-FLAG (Mouse mAb,  
116 #F1804) was from Sigma-Aldrich and anti-β-actin (Rabbit polyclonal, #Ab8227) from Abcam.  
117 Primary antibodies were diluted 1:1000 for immunoblotting, with the exception of anti-GAPDH  
118 and anti-β-actin which were diluted 1:8000. All secondary antibodies, including horseradish  
119 peroxidase (HRP)-conjugated goat anti-rabbit IgG, and anti-mouse IgG (Bio-Rad, 170-6515 and  
120 170-6516) were used at 1:5000 dilution.

121

122 **Serum-dependent growth assay in HNSCC cells**

123 Cells were trypsinized and seeded in triplicate in 12-well plates at  $6 \times 10^4$  cells/well. Following  
124 a 24-h incubation, cells were treated with doxycycline (1 µg/mL) for 24 h. Cells were then washed  
125 twice with phosphate-buffered saline (PBS) and cultured for 72 h in media containing doxycycline

126 with either normal FBS (10%) or low FBS (1-2%). To assess proliferation, cells were stained with  
127 crystal violet, followed by air drying. Crystal violet was eluted with 1 mL sodium citrate solution  
128 (200 mM sodium citrate:100% ethanol=1:1) per well. Eluents were transferred to 96-well plates,  
129 and the absorbance was measured with an Epoch plate reader (BioTek, EPOCH) at 590 nm (A590)  
130 to determine cell growth. The percentage of proliferating cells was calculated by comparison of the  
131 A590 reading from cells grown in normal FBS versus low FBS.

132

### 133 **Immunoblot analysis**

134 Cells were collected and lysed using RIPA, supplemented with protease and phosphatase  
135 inhibitors, followed by sonication and centrifugation at 13,000 rpm for 10 min at 4°C. Protein  
136 concentrations were determined by Bradford assay (Bio-Rad, 500-0006). Proteins were subjected  
137 to SDS-PAGE, transferred to PVDF membranes and blocked for 1 h at room temperature with 5%  
138 milk in TBST. Blotting was performed with primary antibodies at 4°C overnight. After washing  
139 with TBST three times for 30 min in total, membranes were incubated for 1 h at room temperature  
140 with horseradish peroxidase-conjugated anti-rabbit IgG or anti-mouse IgG antibodies. Membranes  
141 were then washed with TBST three times for 30 min in total, and the antigen-antibody reaction was  
142 visualized with ECL western blotting luminol reagent (Santa Cruz Biotechnology, sc-2048).

143

### 144 **Cell migration assay**

145 Cells were trypsinized and seeded at  $8 \times 10^4$  cells in 100  $\mu$ L of serum-free DMEM containing  
146 doxycycline (1  $\mu$ g/mL) into the upper chamber of migration plates with 8  $\mu$ m pores (Corning,  
147 353097). The lower chamber contained 600  $\mu$ L of complete DMEM with 10% FBS and  
148 doxycycline (1  $\mu$ g/mL). After 48 h, the media and remaining non-migratory cells in the inserts were  
149 removed and the inserts were placed into a new 24-well plate. Cells were stained with crystal violet  
150 in 70% ethanol (600  $\mu$ L/well), as well as 100  $\mu$ L in the upper insert. After 15 min, the crystal violet



151 in the internal inserts was removed using cotton tips, followed by washing with distilled water  
152 several times. Inserts were air dried and imaged, followed by quantification using ImageJ software.

153

#### 154 **Colony formation assay**

155 Cells were detached with trypsin and resuspended as single cells (determined by microscopy).  
156 2,000 cells/well were seeded in 6-well plates in triplicate with or without doxycycline (1 µg/mL)  
157 and grown for 21 days. The cells were then fixed with 4% paraformaldehyde and stained with 0.1%  
158 crystal violet stain for 10 min. Following rinsing with distilled water, colonies were imaged and  
159 quantified using ImageJ software.

160

#### 161 **Apoptosis assay**

162 Cells were trypsinized and seeded at  $4 \times 10^5$  cells in complete DMEM containing doxycycline  
163 (1 µg/mL), then treated for 72 h with alpelisib. Treated cells were washed with cold PBS  
164 resuspended in 100 µL binding buffer, then incubated with FITC-labelled antibody against Annexin  
165 V according to the manufacturer's protocol (BioLegend, 640922). Stained cells ( $1 \times 10^4$  per sample)  
166 were analyzed with Attune NXT flow cytometer.

167

#### 168 **Functional assessment in Ba/F3 and MCF10A cells**

169 MCF10A cell line was obtained from the ATCC (CRL-10317) and Ba/F3 cell line was provided  
170 with M.D. Anderson Characterized Cell Line Core facility. The functional effects of *PIK3CA*  
171 mutations were assessed in Ba/F3 and MCF10A by survival assays as previously described(2).  
172 Cells were transfected with WT or *PIK3CA* mutants then cultured for 4 weeks and harvested for  
173 CellTiter-Glo viability assays. The relative cell viability for each mutant was calculated by the  
174 normalization to a range of 1 to 100, where WT *PIK3CA* is 1 and the positive control (a canonical  
175 mutant *PIK3CA* H1047R) is 100.

176

177 **Functional assessment in HeLa cells**

178 HeLa cell line was obtained from ATCC (CCL-2). Mutations were functionally characterized  
179 using an in vitro cell-based assay based on activation of signaling of mutants as previously  
180 described(3). *PIK3CA* mutations (MT) were generated in the wild-type (WT) expression vector  
181 then transfected into a live-cell assay with a fluorescently tagged FOXO1 that is a component of  
182 the PI3K/AKT pathway and which shuttles from the nucleus to the cytoplasm upon pathway  
183 activation. HeLa cells were then fixed and scanned by a fluorescent microscope to detect reporter  
184 localization that generated nuclear-to-cytoplasmic ratios (NCR) to provide comparisons of  
185 signaling activity for each mutant. NCR values were normalized and scored according to the  
186 activation levels of WT *PIK3CA* and the H1047R mutation, so that 0 represented WT activity and  
187 1 was the activity of the *PIK3CA* H1047R. This was achieved using standard rescaling methods:  
188  $\text{score} = (\text{MT} - \text{PIK3CA WT}) / (\text{PIK3CA H1047R} - \text{PIK3CA WT})$ , where MT is the reported NCR of  
189 the studied mutation condition and WT is the reported NCR of the wild-type condition.

190

191 **Supplementary references**

- 192 1. Lui VW, Peyser ND, Ng PK, Hritz J, Zeng Y, Lu Y, Li H, Wang L, Gilbert BR,  
193 General IJ, et al. Frequent mutation of receptor protein tyrosine phosphatases  
194 provides a mechanism for STAT3 hyperactivation in head and neck cancer. *Proc*  
195 *Natl Acad Sci U S A*. 2014;111(3):1114-9.
- 196 2. Dogruluk T, Tsang YH, Espitia M, Chen F, Chen T, Chong Z, Appadurai V,  
197 Dogruluk A, Eterovic AK, Bonnen PE, et al. Identification of Variant-Specific  
198 Functions of PIK3CA by Rapid Phenotyping of Rare Mutations. *Cancer Res*.  
199 2015;75(24):5341-54.
- 200 3. Zimmerman L, Zelichov O, Aizenmann A, Barbash Z, Vidne M, and Tarcic G. A  
201 Novel System for Functional Determination of Variants of Uncertain Significance  
202 using Deep Convolutional Neural Networks. *Sci Rep*. 2020;10(1):4192.  
203

Full unedited gel for Figure 2A

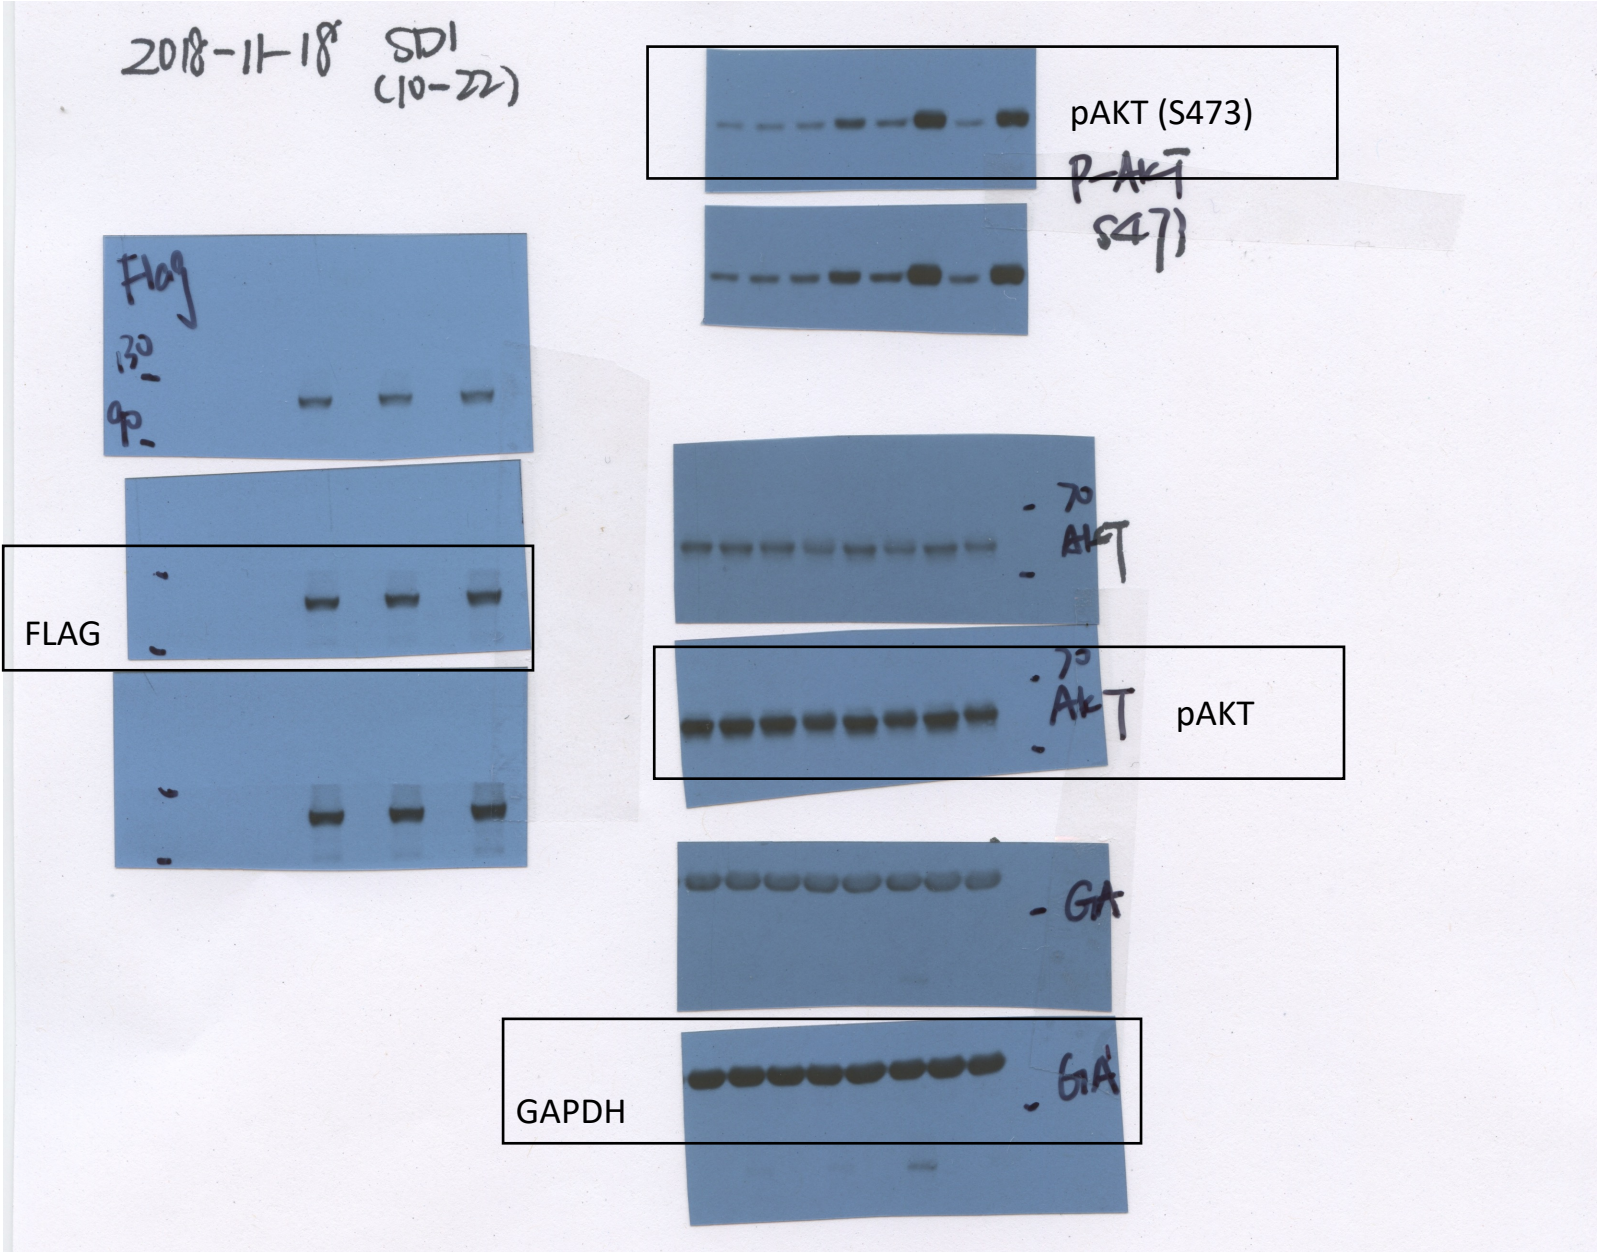

Full unedited gel for Figure 3B

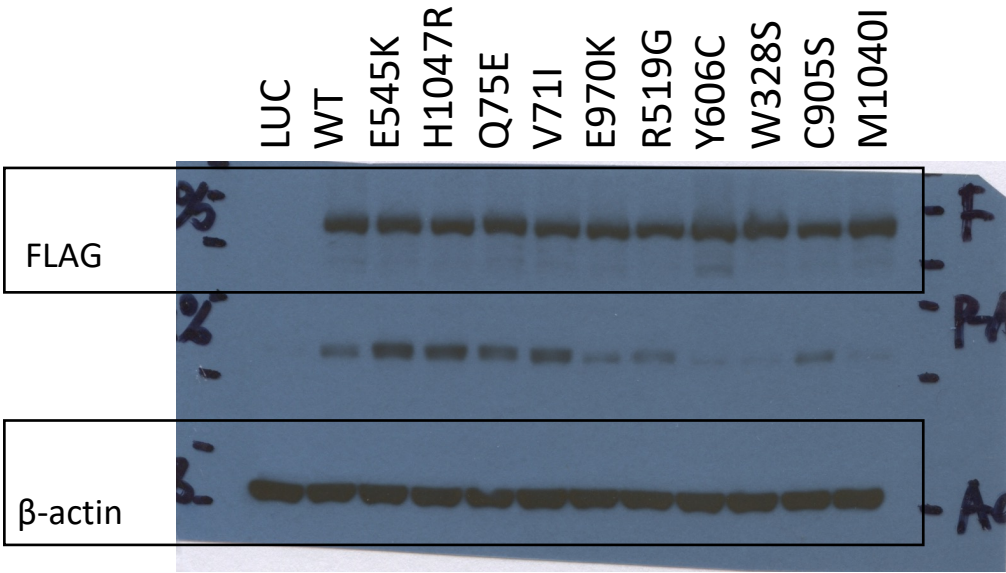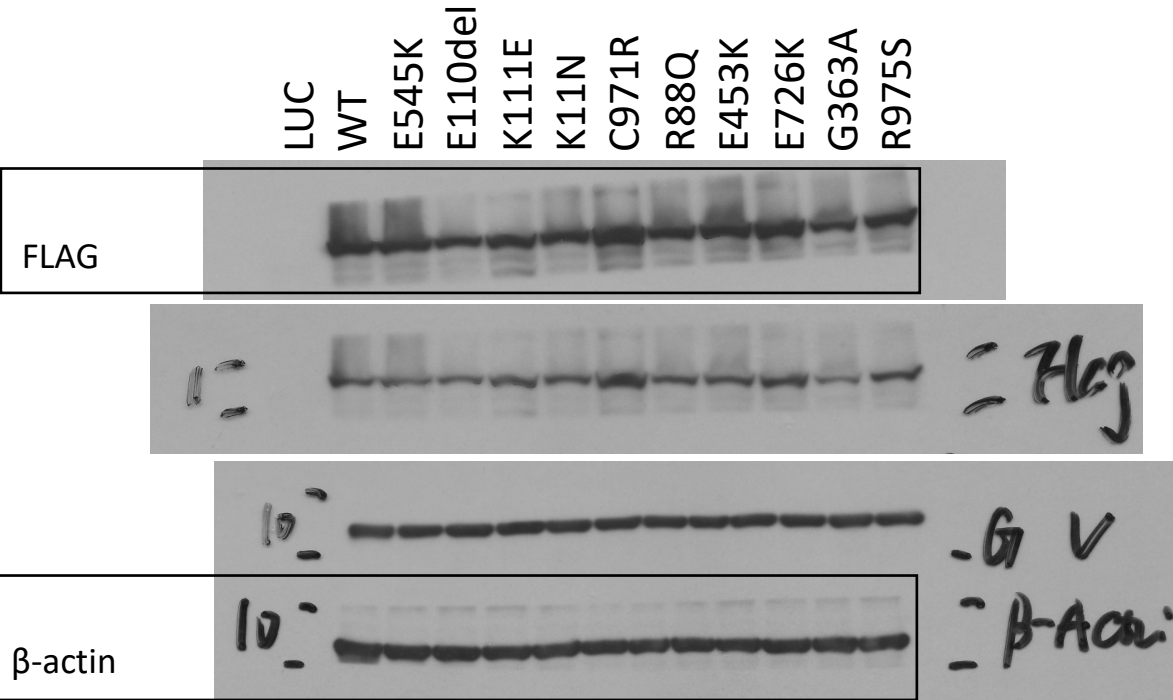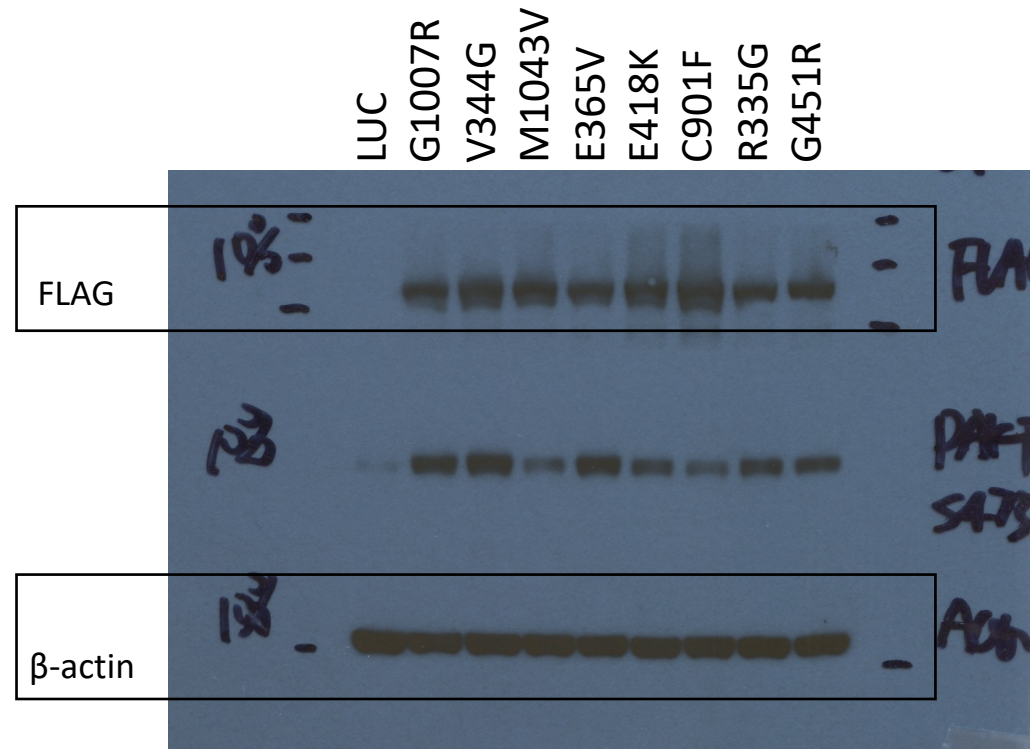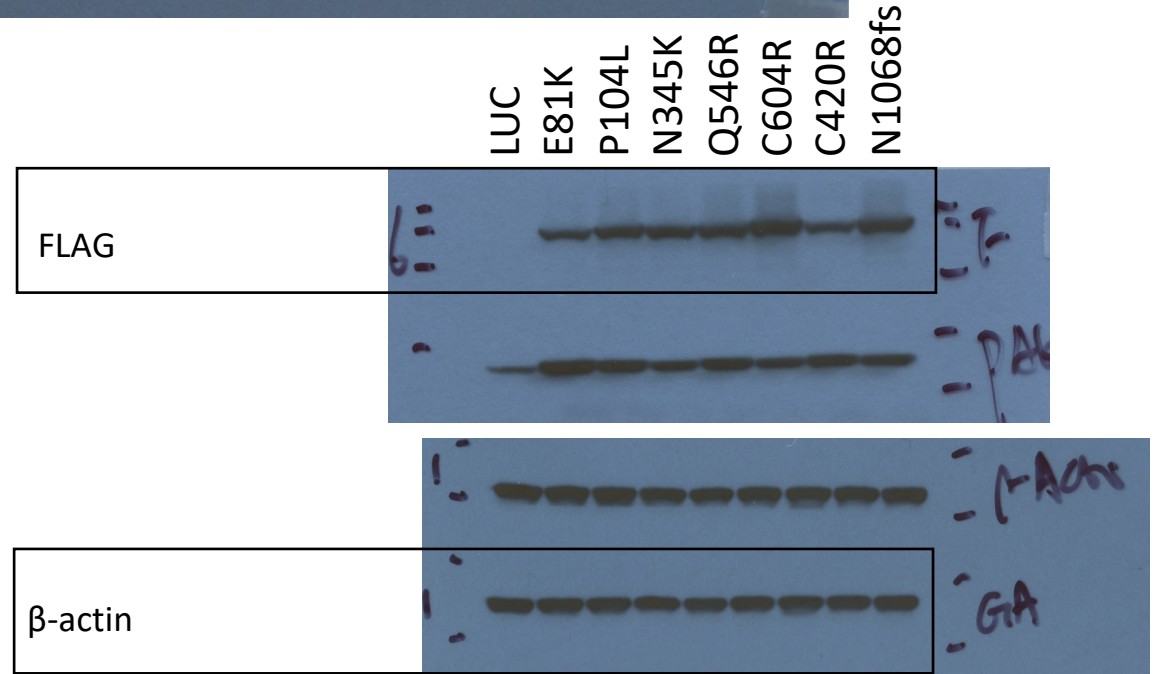

# Full unedited gel for Figure 5B

Panel (left)

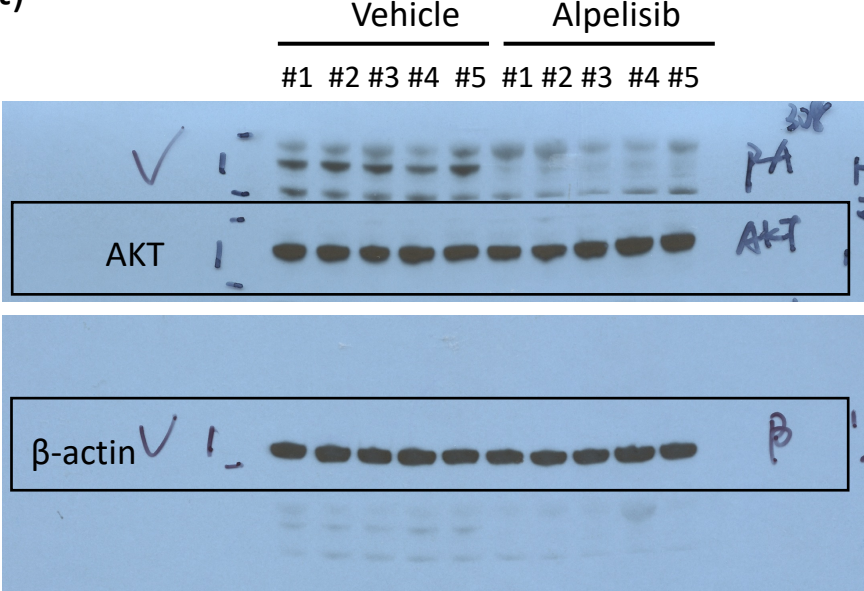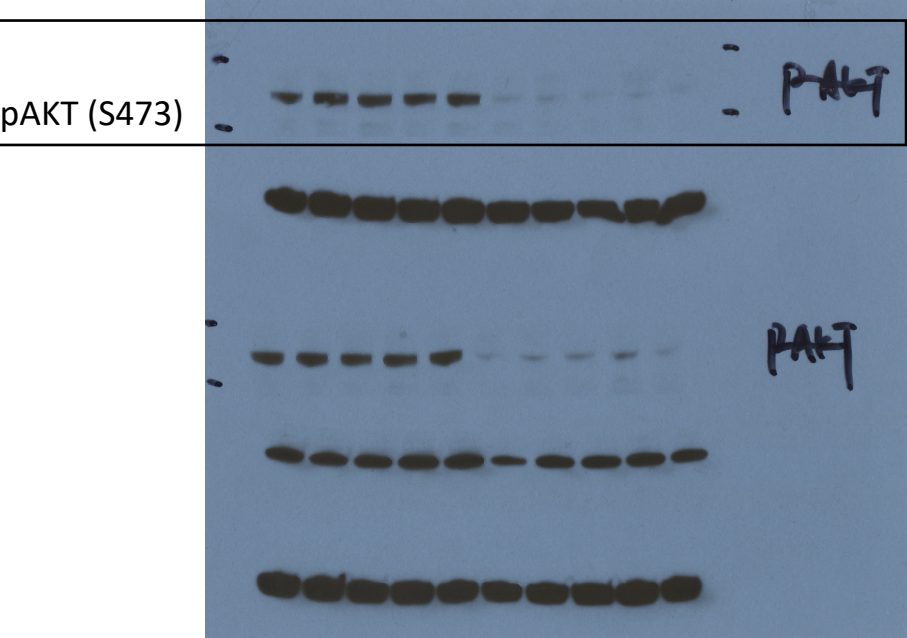

Panel (Right)

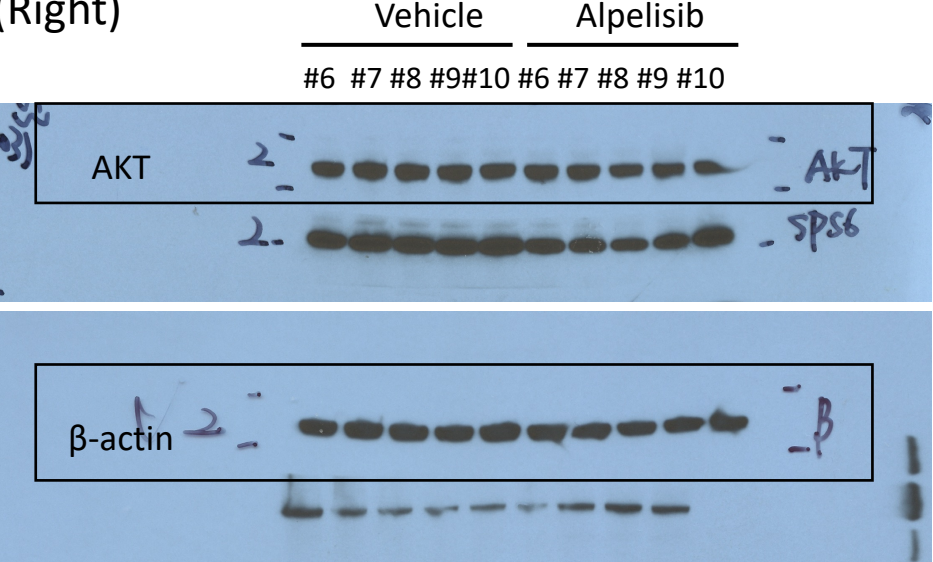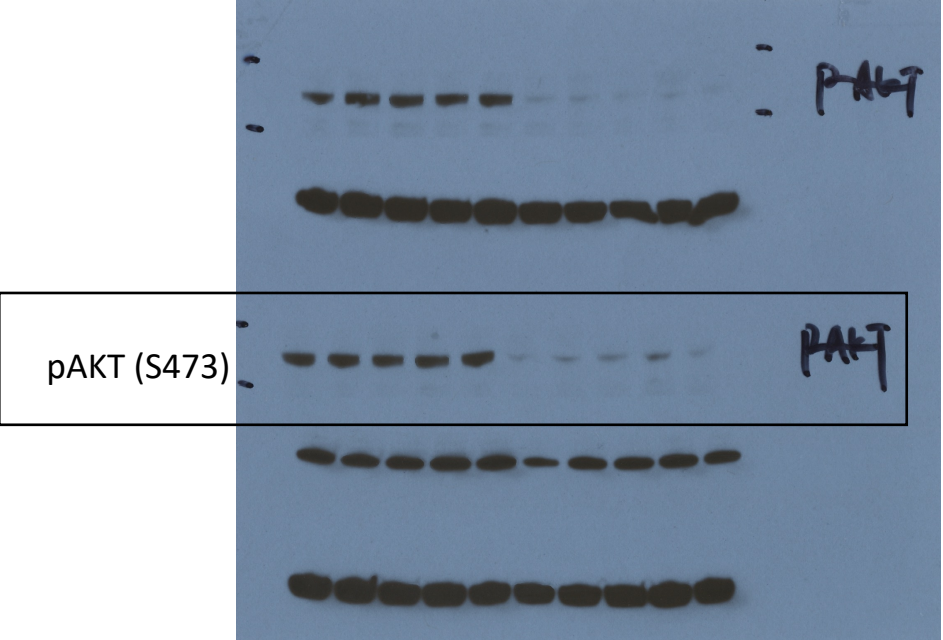

# Full unedited gel for Figure 5D

Panel (left)

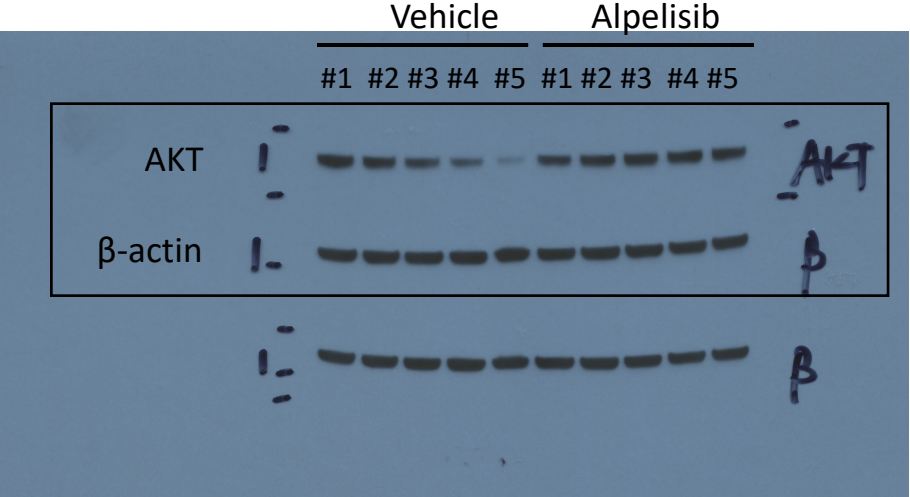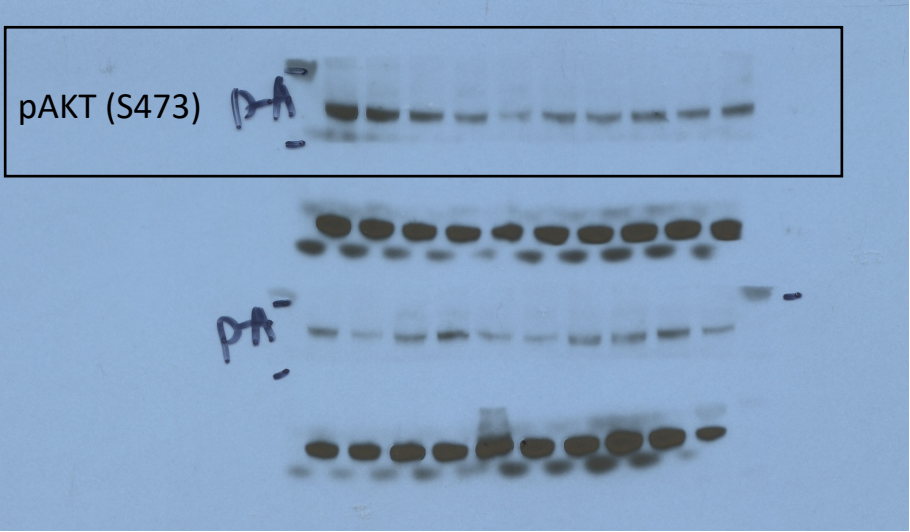

Panel (Right)

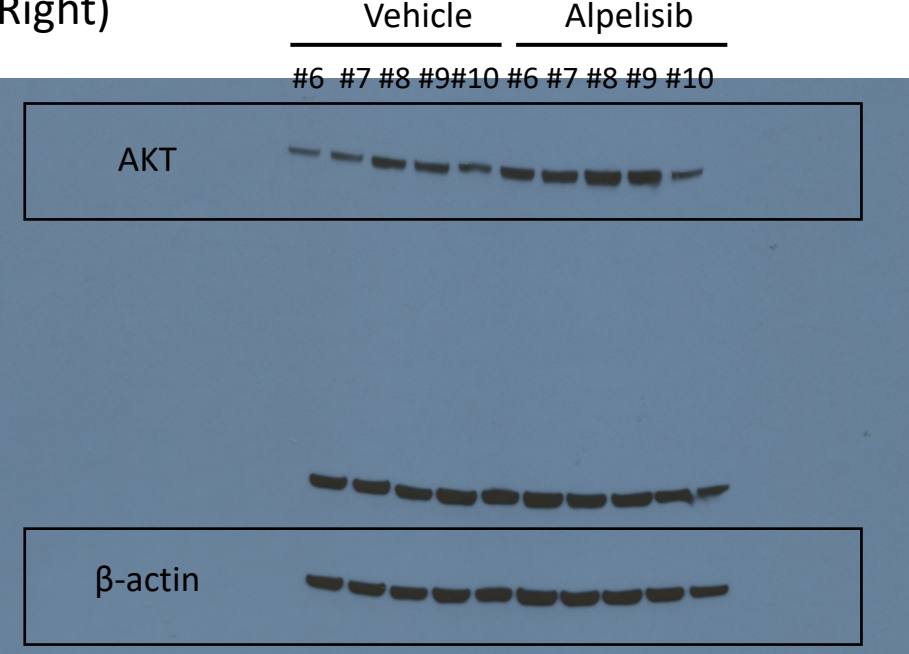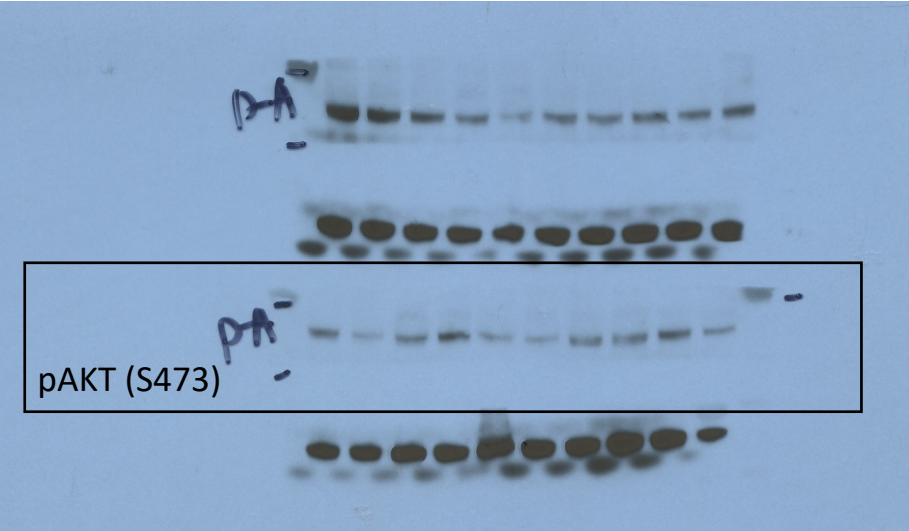

# Full unedited gel for Supplemental Figure 4A

Panel (left)

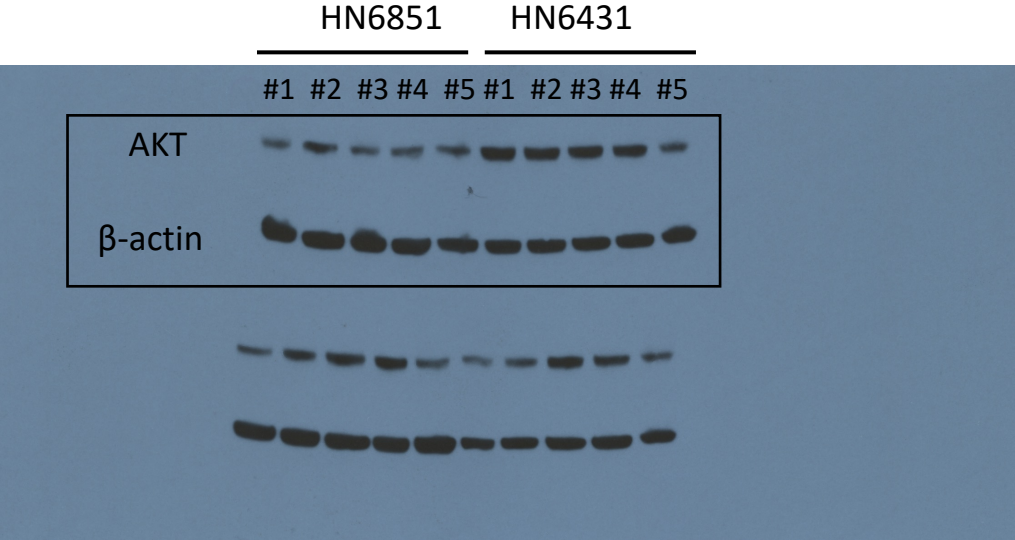

Panel (Right)

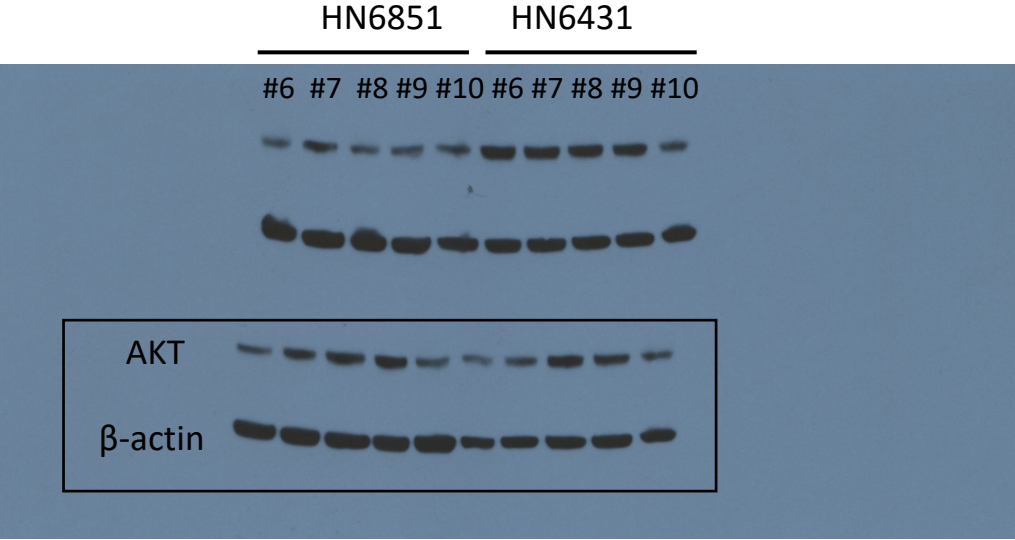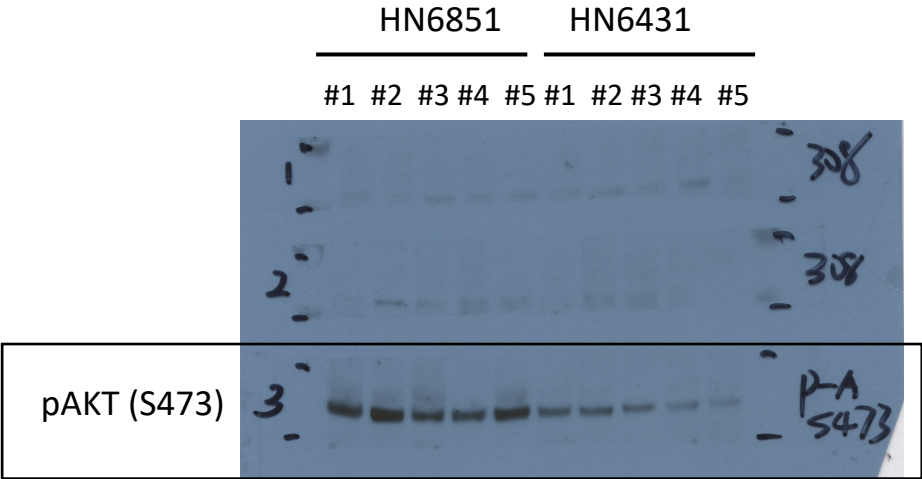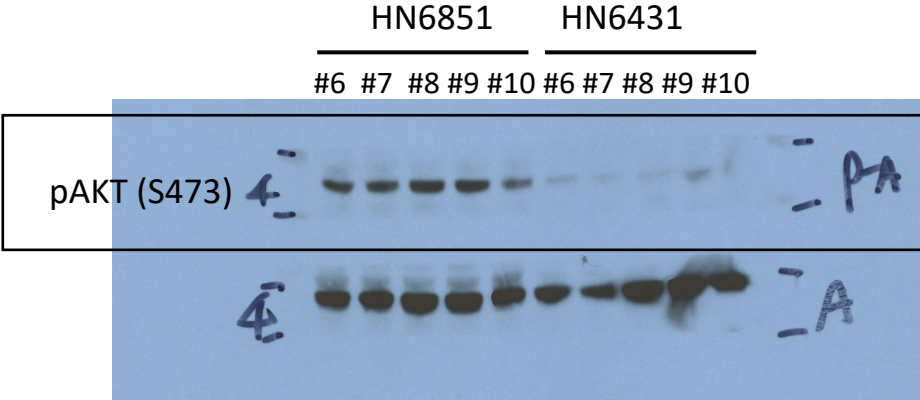



Full unedited gel for Supplemental Figure 4B

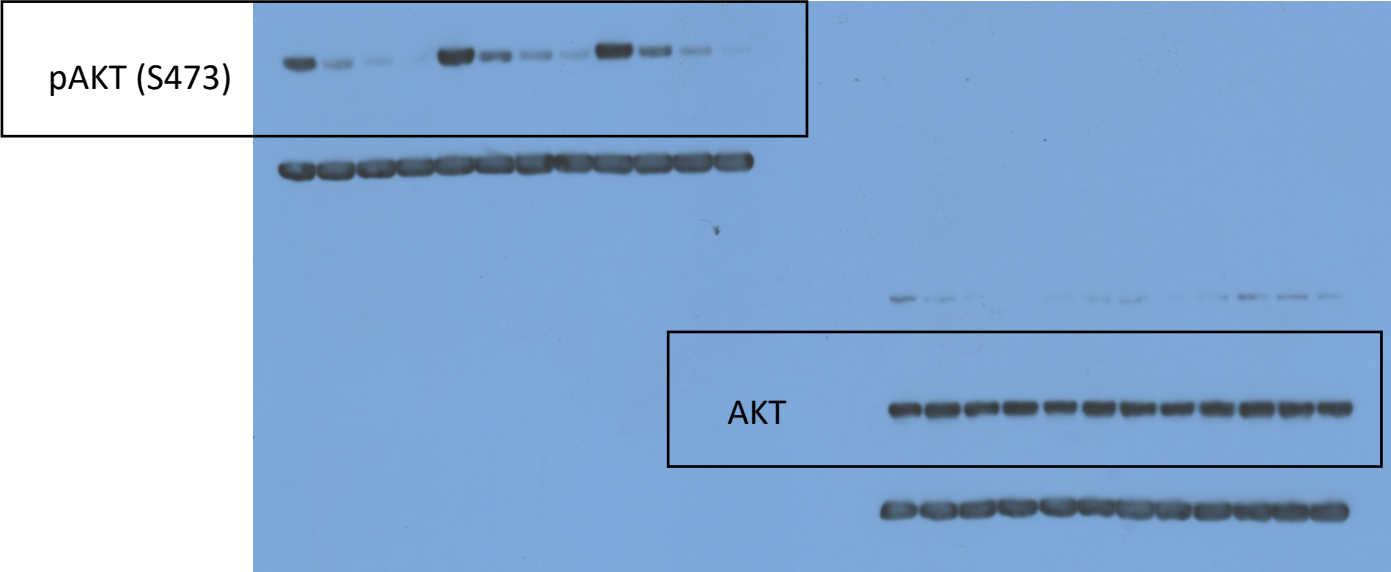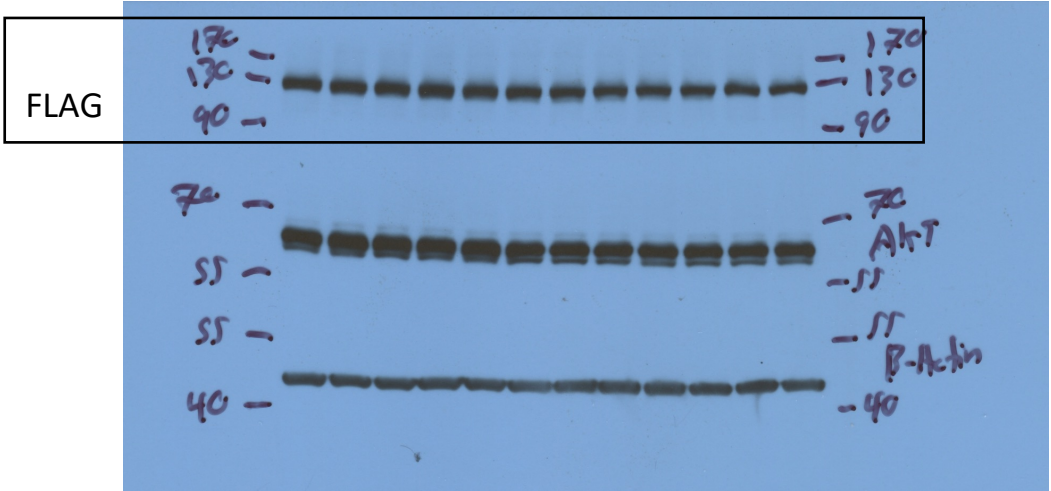

Supplement: jci-131-150335-s154.pdf [file jci-131-150335-s154.pdf]
